# Supplementary material for: Steric control on the redox chemistry of (η5-C9H7)2YbII(THF)2 by 6-aryl substituted iminopyridines
Source: Royal Society of Chemistry journal article supplement (doi:10.1039/c1dt10135h), 2011-01-01
Supplement: c1dt10135h.pdf [file c1dt10135h.pdf]

# Electronic Supporting Information

## Steric Control on the Redox Chemistry of ( $\eta^5$ - $C_9H_7$ )<sub>2</sub>Yb<sup>II</sup>(THF)<sub>2</sub> by 6-Aryl substituted Iminopyridines

*Alexander A. Trifonov,<sup>\*,§</sup> Boris G. Shestakov,<sup>§</sup> Ivan D. Gudilenkov,<sup>§</sup> Georgy K. Fukin<sup>§</sup>*

*Giuliano Giambastiani,<sup>\*,†</sup> Andrea Rossin,<sup>†</sup> Claudio Bianchini,<sup>†</sup> Jonathan Filippi,<sup>†</sup>*

*Lapo Luconi<sup>†</sup> and Lorenzo Sorace<sup>ξ</sup>*

<sup>§</sup> *G.A. Razuvaev Institute of Organometallic Chemistry of Russian Academy of Sciences*

*Tropinina 49, GSP-445, 603950 Nizhny Novgorod (Russia). Fax:(+7) 8314621497*

<sup>†</sup> *Istituto di Chimica dei Composti Organometallici (ICCOM - CNR), Via Madonna*

*del Piano 10, 50019, Sesto Fiorentino, (Italy). Fax:(+39) 0555225203*

<sup>ξ</sup> *Dipartimento di Chimica, Università degli Studi di Firenze, Via della Lastruccia, 13, 50019*

*Sesto Fiorentino (Firenze), Italy.*

### **Contents:**

|                                                                     |           |
|---------------------------------------------------------------------|-----------|
| Crystallographic data and tables for <b>4</b> (Tables S1-S4).....   | pag. S2   |
| Crystallographic data and tables for <b>5</b> (Tables S5-S8).....   | pag. S15  |
| Crystallographic data and tables for <b>6</b> (Tables S9-S11).....  | pag. S27  |
| Crystallographic data and tables for <b>7</b> (Tables S12-S14)..... | pag. S39  |
| UV-Vis spectra of <b>2a-d</b> and <b>4-7</b> (Fig. S1-S4)           | pag. S 53 |

## Electronic Supporting Information

### Crystallographic data and tables for 4 (CCDC: 794890)

**Table S1.** Atomic coordinates ( $\times 10^4$ ) and equivalent isotropic displacement parameters ( $\text{\AA}^2 \times 10^3$ ) for 4.  $U(\text{eq})$  is defined as one third of the trace of the orthogonalized  $U^{ij}$  tensor.

|       | x       | y        | z        | $U(\text{eq})$ |
|-------|---------|----------|----------|----------------|
| C(1)  | 5690(1) | 429(2)   | -2490(1) | 18(1)          |
| C(2)  | 5569(1) | 1723(2)  | -2544(1) | 21(1)          |
| C(3)  | 5893(1) | 2481(2)  | -3078(1) | 22(1)          |
| C(4)  | 6322(1) | 1929(2)  | -3549(1) | 22(1)          |
| C(5)  | 6422(1) | 610(2)   | -3465(1) | 17(1)          |
| C(6)  | 6868(1) | -12(2)   | -3947(1) | 23(1)          |
| C(7)  | 7322(1) | 494(2)   | -4354(2) | 44(1)          |
| C(8)  | 7673(1) | -448(3)  | -4725(2) | 55(1)          |
| C(9)  | 7480(1) | -1657(2) | -4604(2) | 38(1)          |
| C(10) | 5320(1) | -380(2)  | -1975(1) | 18(1)          |
| C(11) | 4932(1) | -2213(2) | -1447(1) | 17(1)          |
| C(12) | 4436(1) | -2294(2) | -1930(2) | 24(1)          |
| C(13) | 3962(1) | -2808(2) | -1540(2) | 31(1)          |
| C(14) | 3975(1) | -3271(2) | -717(2)  | 32(1)          |
| C(15) | 4477(1) | -3277(2) | -274(1)  | 26(1)          |
| C(16) | 4966(1) | -2759(2) | -623(1)  | 21(1)          |
| C(17) | 4394(1) | -1928(3) | -2870(2) | 27(1)          |
| C(18) | 3990(1) | -817(3)  | -3027(2) | 41(1)          |
| C(19) | 4206(1) | -3096(3) | -3407(2) | 37(1)          |
| C(20) | 5511(1) | -2760(2) | -112(1)  | 26(1)          |
| C(21) | 5667(1) | -4124(2) | 155(2)   | 38(1)          |
| C(22) | 5469(1) | -1920(3) | 684(2)   | 40(1)          |
| C(23) | 6340(1) | -4475(2) | -3471(1) | 20(1)          |
| C(24) | 5786(1) | -4147(2) | -3188(1) | 21(1)          |
| C(25) | 5754(1) | -4450(1) | -2319(2) | 22(1)          |
| C(26) | 6280(1) | -4887(2) | -2021(1) | 22(1)          |
| C(27) | 6655(1) | -4917(2) | -2738(1) | 21(1)          |
| C(28) | 7213(1) | -5340(2) | -2853(2) | 29(1)          |
| C(29) | 7447(1) | -5356(2) | -3649(2) | 35(1)          |
| C(30) | 7137(1) | -4930(2) | -4374(2) | 31(1)          |
| C(31) | 6598(1) | -4495(2) | -4288(1) | 26(1)          |
| C(32) | 7185(1) | -530(2)  | -1640(1) | 24(1)          |

## Electronic Supporting Information

|       |         |           |          |        |
|-------|---------|-----------|----------|--------|
| C(33) | 7486(1) | -1593(2)  | -1951(2) | 30(1)  |
| C(34) | 7359(1) | -2641(2)  | -1434(2) | 29(1)  |
| C(35) | 6953(1) | -2272(2)  | -819(1)  | 25(1)  |
| C(36) | 6849(1) | -948(2)   | -937(1)  | 23(1)  |
| C(37) | 6504(1) | -63(2)    | -499(1)  | 26(1)  |
| C(38) | 6504(1) | 1191(2)   | -739(2)  | 33(1)  |
| C(39) | 6848(1) | 1619(2)   | -1415(2) | 36(1)  |
| C(40) | 7178(1) | 799(2)    | -1864(1) | 33(1)  |
| C(41) | 6011(2) | -2283(6)  | -6301(3) | 128(2) |
| C(42) | 5532(2) | -3013(4)  | -5984(3) | 76(1)  |
| C(43) | 5193(3) | -2617(4)  | -5453(3) | 92(2)  |
| C(44) | 5256(2) | -1435(4)  | -5112(2) | 79(1)  |
| C(45) | 5654(2) | -637(4)   | -5317(2) | 72(1)  |
| C(46) | 6069(2) | -993(5)   | -5930(3) | 96(2)  |
| C(47) | 6320(4) | -3029(10) | -6944(5) | 358(4) |
| N(1)  | 6112(1) | -140(2)   | -2941(1) | 16(1)  |
| N(2)  | 5414(1) | -1564(2)  | -1813(1) | 16(1)  |
| S(1)  | 6860(1) | -1647(1)  | -4050(1) | 22(1)  |
| Yb(1) | 6400(1) | -2331(1)  | -2322(1) | 15(1)  |

---

**Table S2.** Bond lengths [ $\text{\AA}$ ] and angles [ $^\circ$ ] for **4**.

|            |          |
|------------|----------|
| C(1)-N(1)  | 1.360(2) |
| C(1)-C(2)  | 1.386(3) |
| C(1)-C(10) | 1.459(3) |
| C(2)-C(3)  | 1.383(3) |
| C(2)-H(2)  | 0.9500   |
| C(3)-C(4)  | 1.382(3) |
| C(3)-H(3)  | 0.9500   |
| C(4)-C(5)  | 1.406(3) |
| C(4)-H(4)  | 0.9500   |
| C(5)-N(1)  | 1.352(3) |
| C(5)-C(6)  | 1.451(3) |
| C(6)-C(7)  | 1.359(3) |
| C(6)-S(1)  | 1.717(2) |

## Electronic Supporting Information

|              |          |
|--------------|----------|
| C(7)-C(8)    | 1.412(4) |
| C(7)-H(7)    | 0.9500   |
| C(8)-C(9)    | 1.357(4) |
| C(8)-H(8)    | 0.9500   |
| C(9)-S(1)    | 1.706(2) |
| C(9)-H(9)    | 0.9500   |
| C(10)-N(2)   | 1.283(3) |
| C(10)-H(10)  | 0.9500   |
| C(11)-C(12)  | 1.398(3) |
| C(11)-C(16)  | 1.413(3) |
| C(11)-N(2)   | 1.447(2) |
| C(12)-C(13)  | 1.386(3) |
| C(12)-C(17)  | 1.524(3) |
| C(13)-C(14)  | 1.378(4) |
| C(13)-H(13)  | 0.9500   |
| C(14)-C(15)  | 1.376(3) |
| C(14)-H(14)  | 0.9500   |
| C(15)-C(16)  | 1.389(3) |
| C(15)-H(15)  | 0.9500   |
| C(16)-C(20)  | 1.520(3) |
| C(17)-C(18)  | 1.525(4) |
| C(17)-C(19)  | 1.548(4) |
| C(17)-H(17)  | 1.0000   |
| C(18)-H(18A) | 0.9800   |
| C(18)-H(18B) | 0.9800   |
| C(18)-H(18C) | 0.9800   |
| C(19)-H(19A) | 0.9800   |
| C(19)-H(19B) | 0.9800   |
| C(19)-H(19C) | 0.9800   |
| C(20)-C(22)  | 1.528(3) |
| C(20)-C(21)  | 1.532(3) |
| C(20)-H(20)  | 1.0000   |
| C(21)-H(21A) | 0.9800   |
| C(21)-H(21B) | 0.9800   |
| C(21)-H(21C) | 0.9800   |
| C(22)-H(22A) | 0.9800   |
| C(22)-H(22B) | 0.9800   |
| C(22)-H(22C) | 0.9800   |

## Electronic Supporting Information

|             |            |
|-------------|------------|
| C(23)-C(31) | 1.417(3)   |
| C(23)-C(24) | 1.427(3)   |
| C(23)-C(27) | 1.444(3)   |
| C(23)-Yb(1) | 2.877(2)   |
| C(24)-C(25) | 1.400(4)   |
| C(24)-Yb(1) | 2.7486(19) |
| C(24)-H(24) | 0.9500     |
| C(25)-C(26) | 1.406(3)   |
| C(25)-Yb(1) | 2.6917(15) |
| C(25)-H(25) | 0.9500     |
| C(26)-C(27) | 1.432(3)   |
| C(26)-Yb(1) | 2.729(2)   |
| C(26)-H(26) | 0.9500     |
| C(27)-C(28) | 1.407(3)   |
| C(27)-Yb(1) | 2.8458(19) |
| C(28)-C(29) | 1.364(3)   |
| C(28)-H(28) | 0.9500     |
| C(29)-C(30) | 1.423(3)   |
| C(29)-H(29) | 0.9500     |
| C(30)-C(31) | 1.361(3)   |
| C(30)-H(30) | 0.9500     |
| C(31)-H(31) | 0.9500     |
| C(32)-C(33) | 1.408(3)   |
| C(32)-C(36) | 1.426(3)   |
| C(32)-C(40) | 1.433(3)   |
| C(32)-Yb(1) | 2.854(2)   |
| C(33)-C(34) | 1.396(3)   |
| C(33)-Yb(1) | 2.747(2)   |
| C(33)-H(33) | 0.9500     |
| C(34)-C(35) | 1.414(3)   |
| C(34)-Yb(1) | 2.683(2)   |
| C(34)-H(34) | 0.9500     |
| C(35)-C(36) | 1.418(3)   |
| C(35)-Yb(1) | 2.693(2)   |
| C(35)-H(35) | 0.9500     |
| C(36)-C(37) | 1.412(3)   |
| C(36)-Yb(1) | 2.816(2)   |
| C(37)-C(38) | 1.364(3)   |

## Electronic Supporting Information

|                 |            |
|-----------------|------------|
| C(37)-H(37)     | 0.9500     |
| C(38)-C(39)     | 1.408(4)   |
| C(38)-H(38)     | 0.9500     |
| C(39)-C(40)     | 1.357(3)   |
| C(39)-H(39)     | 0.9500     |
| C(40)-H(40)     | 0.9500     |
| C(41)-C(42)     | 1.454(7)   |
| C(41)-C(46)     | 1.475(8)   |
| C(41)-C(47)     | 1.470(9)   |
| C(42)-C(43)     | 1.228(7)   |
| C(42)-H(42)     | 0.9500     |
| C(43)-C(44)     | 1.355(6)   |
| C(43)-H(43)     | 0.9500     |
| C(44)-C(45)     | 1.300(6)   |
| C(44)-H(44)     | 0.9500     |
| C(45)-C(46)     | 1.423(6)   |
| C(45)-H(45)     | 0.9500     |
| C(46)-H(46)     | 0.9500     |
| C(47)-H(47A)    | 0.9800     |
| C(47)-H(47B)    | 0.9800     |
| C(47)-H(47C)    | 0.9800     |
| N(1)-Yb(1)      | 2.5804(16) |
| N(2)-Yb(1)      | 2.5956(15) |
| S(1)-Yb(1)      | 3.0020(5)  |
|                 |            |
| N(1)-C(1)-C(2)  | 123.12(16) |
| N(1)-C(1)-C(10) | 118.28(16) |
| C(2)-C(1)-C(10) | 118.43(16) |
| C(3)-C(2)-C(1)  | 118.80(18) |
| C(3)-C(2)-H(2)  | 120.6      |
| C(1)-C(2)-H(2)  | 120.6      |
| C(4)-C(3)-C(2)  | 119.42(18) |
| C(4)-C(3)-H(3)  | 120.3      |
| C(2)-C(3)-H(3)  | 120.3      |
| C(3)-C(4)-C(5)  | 118.94(19) |
| C(3)-C(4)-H(4)  | 120.5      |
| C(5)-C(4)-H(4)  | 120.5      |
| N(1)-C(5)-C(4)  | 122.24(18) |

## Electronic Supporting Information

|                   |            |
|-------------------|------------|
| N(1)-C(5)-C(6)    | 116.82(17) |
| C(4)-C(5)-C(6)    | 120.94(18) |
| C(7)-C(6)-C(5)    | 130.2(2)   |
| C(7)-C(6)-S(1)    | 110.61(17) |
| C(5)-C(6)-S(1)    | 119.17(15) |
| C(6)-C(7)-C(8)    | 112.8(2)   |
| C(6)-C(7)-H(7)    | 123.6      |
| C(8)-C(7)-H(7)    | 123.6      |
| C(9)-C(8)-C(7)    | 113.3(2)   |
| C(9)-C(8)-H(8)    | 123.4      |
| C(7)-C(8)-H(8)    | 123.4      |
| C(8)-C(9)-S(1)    | 110.74(19) |
| C(8)-C(9)-H(9)    | 124.6      |
| S(1)-C(9)-H(9)    | 124.6      |
| N(2)-C(10)-C(1)   | 124.41(17) |
| N(2)-C(10)-H(10)  | 117.8      |
| C(1)-C(10)-H(10)  | 117.8      |
| C(12)-C(11)-C(16) | 121.07(19) |
| C(12)-C(11)-N(2)  | 118.49(17) |
| C(16)-C(11)-N(2)  | 120.44(18) |
| C(13)-C(12)-C(11) | 117.8(2)   |
| C(13)-C(12)-C(17) | 117.9(2)   |
| C(11)-C(12)-C(17) | 124.2(2)   |
| C(14)-C(13)-C(12) | 121.9(2)   |
| C(14)-C(13)-H(13) | 119.0      |
| C(12)-C(13)-H(13) | 119.0      |
| C(15)-C(14)-C(13) | 119.5(2)   |
| C(15)-C(14)-H(14) | 120.3      |
| C(13)-C(14)-H(14) | 120.3      |
| C(14)-C(15)-C(16) | 121.3(2)   |
| C(14)-C(15)-H(15) | 119.3      |
| C(16)-C(15)-H(15) | 119.3      |
| C(15)-C(16)-C(11) | 118.01(19) |
| C(15)-C(16)-C(20) | 120.06(19) |
| C(11)-C(16)-C(20) | 121.91(19) |
| C(12)-C(17)-C(18) | 112.9(2)   |
| C(12)-C(17)-C(19) | 110.2(2)   |
| C(18)-C(17)-C(19) | 109.4(2)   |

## Electronic Supporting Information

|                     |            |
|---------------------|------------|
| C(12)-C(17)-H(17)   | 108.1      |
| C(18)-C(17)-H(17)   | 108.1      |
| C(19)-C(17)-H(17)   | 108.1      |
| C(17)-C(18)-H(18A)  | 109.5      |
| C(17)-C(18)-H(18B)  | 109.5      |
| H(18A)-C(18)-H(18B) | 109.5      |
| C(17)-C(18)-H(18C)  | 109.5      |
| H(18A)-C(18)-H(18C) | 109.5      |
| H(18B)-C(18)-H(18C) | 109.5      |
| C(17)-C(19)-H(19A)  | 109.5      |
| C(17)-C(19)-H(19B)  | 109.5      |
| H(19A)-C(19)-H(19B) | 109.5      |
| C(17)-C(19)-H(19C)  | 109.5      |
| H(19A)-C(19)-H(19C) | 109.5      |
| H(19B)-C(19)-H(19C) | 109.5      |
| C(16)-C(20)-C(22)   | 111.91(19) |
| C(16)-C(20)-C(21)   | 110.46(18) |
| C(22)-C(20)-C(21)   | 109.1(2)   |
| C(16)-C(20)-H(20)   | 108.4      |
| C(22)-C(20)-H(20)   | 108.4      |
| C(21)-C(20)-H(20)   | 108.4      |
| C(20)-C(21)-H(21A)  | 109.5      |
| C(20)-C(21)-H(21B)  | 109.5      |
| H(21A)-C(21)-H(21B) | 109.5      |
| C(20)-C(21)-H(21C)  | 109.5      |
| H(21A)-C(21)-H(21C) | 109.5      |
| H(21B)-C(21)-H(21C) | 109.5      |
| C(20)-C(22)-H(22A)  | 109.5      |
| C(20)-C(22)-H(22B)  | 109.5      |
| H(22A)-C(22)-H(22B) | 109.5      |
| C(20)-C(22)-H(22C)  | 109.5      |
| H(22A)-C(22)-H(22C) | 109.5      |
| H(22B)-C(22)-H(22C) | 109.5      |
| C(31)-C(23)-C(24)   | 132.86(19) |
| C(31)-C(23)-C(27)   | 119.33(18) |
| C(24)-C(23)-C(27)   | 107.73(18) |
| C(31)-C(23)-Yb(1)   | 123.70(14) |
| C(24)-C(23)-Yb(1)   | 70.36(11)  |



## Electronic Supporting Information

|                   |            |
|-------------------|------------|
| C(27)-C(23)-Yb(1) | 74.19(11)  |
| C(25)-C(24)-C(23) | 107.28(17) |
| C(25)-C(24)-Yb(1) | 72.85(10)  |
| C(23)-C(24)-Yb(1) | 80.36(11)  |
| C(25)-C(24)-H(24) | 126.4      |
| C(23)-C(24)-H(24) | 126.4      |
| Yb(1)-C(24)-H(24) | 113.0      |
| C(24)-C(25)-C(26) | 110.39(19) |
| C(24)-C(25)-Yb(1) | 77.36(10)  |
| C(26)-C(25)-Yb(1) | 76.43(10)  |
| C(24)-C(25)-H(25) | 124.8      |
| C(26)-C(25)-H(25) | 124.8      |
| Yb(1)-C(25)-H(25) | 113.4      |
| C(25)-C(26)-C(27) | 107.25(19) |
| C(25)-C(26)-Yb(1) | 73.52(10)  |
| C(27)-C(26)-Yb(1) | 79.71(11)  |
| C(25)-C(26)-H(26) | 126.4      |
| C(27)-C(26)-H(26) | 126.4      |
| Yb(1)-C(26)-H(26) | 112.9      |
| C(28)-C(27)-C(26) | 133.7(2)   |
| C(28)-C(27)-C(23) | 118.99(19) |
| C(26)-C(27)-C(23) | 107.22(17) |
| C(28)-C(27)-Yb(1) | 121.84(13) |
| C(26)-C(27)-Yb(1) | 70.62(11)  |
| C(23)-C(27)-Yb(1) | 76.58(11)  |
| C(29)-C(28)-C(27) | 120.1(2)   |
| C(29)-C(28)-H(28) | 119.9      |
| C(27)-C(28)-H(28) | 119.9      |
| C(28)-C(29)-C(30) | 121.0(2)   |
| C(28)-C(29)-H(29) | 119.5      |
| C(30)-C(29)-H(29) | 119.5      |
| C(31)-C(30)-C(29) | 120.7(2)   |
| C(31)-C(30)-H(30) | 119.7      |
| C(29)-C(30)-H(30) | 119.7      |
| C(30)-C(31)-C(23) | 119.8(2)   |
| C(30)-C(31)-H(31) | 120.1      |
| C(23)-C(31)-H(31) | 120.1      |
| C(33)-C(32)-C(36) | 107.88(19) |

## Electronic Supporting Information

|                   |            |
|-------------------|------------|
| C(33)-C(32)-C(40) | 133.3(2)   |
| C(36)-C(32)-C(40) | 118.7(2)   |
| C(33)-C(32)-Yb(1) | 71.29(12)  |
| C(36)-C(32)-Yb(1) | 73.97(11)  |
| C(40)-C(32)-Yb(1) | 122.81(14) |
| C(34)-C(33)-C(32) | 108.1(2)   |
| C(34)-C(33)-Yb(1) | 72.55(13)  |
| C(32)-C(33)-Yb(1) | 79.68(12)  |
| C(34)-C(33)-H(33) | 126.0      |
| C(32)-C(33)-H(33) | 126.0      |
| Yb(1)-C(33)-H(33) | 114.1      |
| C(33)-C(34)-C(35) | 109.1(2)   |
| C(33)-C(34)-Yb(1) | 77.68(13)  |
| C(35)-C(34)-Yb(1) | 75.16(13)  |
| C(33)-C(34)-H(34) | 125.5      |
| C(35)-C(34)-H(34) | 125.5      |
| Yb(1)-C(34)-H(34) | 113.9      |
| C(34)-C(35)-C(36) | 107.22(19) |
| C(34)-C(35)-Yb(1) | 74.35(13)  |
| C(36)-C(35)-Yb(1) | 79.95(12)  |
| C(34)-C(35)-H(35) | 126.4      |
| C(36)-C(35)-H(35) | 126.4      |
| Yb(1)-C(35)-H(35) | 112.0      |
| C(37)-C(36)-C(35) | 132.6(2)   |
| C(37)-C(36)-C(32) | 119.7(2)   |
| C(35)-C(36)-C(32) | 107.66(19) |
| C(37)-C(36)-Yb(1) | 119.45(13) |
| C(35)-C(36)-Yb(1) | 70.33(12)  |
| C(32)-C(36)-Yb(1) | 76.91(11)  |
| C(38)-C(37)-C(36) | 119.8(2)   |
| C(38)-C(37)-H(37) | 120.1      |
| C(36)-C(37)-H(37) | 120.1      |
| C(37)-C(38)-C(39) | 120.8(2)   |
| C(37)-C(38)-H(38) | 119.6      |
| C(39)-C(38)-H(38) | 119.6      |
| C(40)-C(39)-C(38) | 121.5(2)   |
| C(40)-C(39)-H(39) | 119.3      |
| C(38)-C(39)-H(39) | 119.3      |

## Electronic Supporting Information

|                     |            |
|---------------------|------------|
| C(39)-C(40)-C(32)   | 119.4(2)   |
| C(39)-C(40)-H(40)   | 120.3      |
| C(32)-C(40)-H(40)   | 120.3      |
| C(42)-C(41)-C(46)   | 114.7(4)   |
| C(42)-C(41)-C(47)   | 110.1(6)   |
| C(46)-C(41)-C(47)   | 135.1(6)   |
| C(43)-C(42)-C(41)   | 124.4(5)   |
| C(43)-C(42)-H(42)   | 117.8      |
| C(41)-C(42)-H(42)   | 117.8      |
| C(42)-C(43)-C(44)   | 120.1(5)   |
| C(42)-C(43)-H(43)   | 120.0      |
| C(44)-C(43)-H(43)   | 120.0      |
| C(45)-C(44)-C(43)   | 124.6(5)   |
| C(45)-C(44)-H(44)   | 117.7      |
| C(43)-C(44)-H(44)   | 117.7      |
| C(44)-C(45)-C(46)   | 120.0(4)   |
| C(44)-C(45)-H(45)   | 120.0      |
| C(46)-C(45)-H(45)   | 120.0      |
| C(45)-C(46)-C(41)   | 116.1(4)   |
| C(45)-C(46)-H(46)   | 121.9      |
| C(41)-C(46)-H(46)   | 121.9      |
| C(41)-C(47)-H(47A)  | 109.5      |
| C(41)-C(47)-H(47B)  | 109.4      |
| H(47A)-C(47)-H(47B) | 109.5      |
| C(41)-C(47)-H(47C)  | 109.5      |
| H(47A)-C(47)-H(47C) | 109.5      |
| H(47B)-C(47)-H(47C) | 109.5      |
| C(5)-N(1)-C(1)      | 117.48(16) |
| C(5)-N(1)-Yb(1)     | 126.75(12) |
| C(1)-N(1)-Yb(1)     | 112.79(12) |
| C(10)-N(2)-C(11)    | 113.29(16) |
| C(10)-N(2)-Yb(1)    | 113.13(12) |
| C(11)-N(2)-Yb(1)    | 133.36(11) |
| C(9)-S(1)-C(6)      | 92.58(11)  |
| C(9)-S(1)-Yb(1)     | 140.31(9)  |
| C(6)-S(1)-Yb(1)     | 99.02(7)   |
| N(1)-Yb(1)-N(2)     | 66.56(5)   |
| N(1)-Yb(1)-C(34)    | 121.75(6)  |

## Electronic Supporting Information

|                   |           |
|-------------------|-----------|
| N(2)-Yb(1)-C(34)  | 129.80(6) |
| N(1)-Yb(1)-C(25)  | 125.53(6) |
| N(2)-Yb(1)-C(25)  | 75.08(5)  |
| C(34)-Yb(1)-C(25) | 112.36(7) |
| N(1)-Yb(1)-C(35)  | 115.87(6) |
| N(2)-Yb(1)-C(35)  | 99.34(6)  |
| C(34)-Yb(1)-C(35) | 30.49(7)  |
| C(25)-Yb(1)-C(35) | 107.06(8) |
| N(1)-Yb(1)-C(26)  | 155.11(6) |
| N(2)-Yb(1)-C(26)  | 98.98(6)  |
| C(34)-Yb(1)-C(26) | 83.13(7)  |
| C(25)-Yb(1)-C(26) | 30.05(6)  |
| C(35)-Yb(1)-C(26) | 85.55(6)  |
| N(1)-Yb(1)-C(33)  | 94.46(6)  |
| N(2)-Yb(1)-C(33)  | 133.69(6) |
| C(34)-Yb(1)-C(33) | 29.76(7)  |
| C(25)-Yb(1)-C(33) | 139.70(7) |
| C(35)-Yb(1)-C(33) | 49.74(7)  |
| C(26)-Yb(1)-C(33) | 109.66(7) |
| N(1)-Yb(1)-C(24)  | 106.74(5) |
| N(2)-Yb(1)-C(24)  | 83.61(5)  |
| C(34)-Yb(1)-C(24) | 128.33(6) |
| C(25)-Yb(1)-C(24) | 29.79(8)  |
| C(35)-Yb(1)-C(24) | 134.75(6) |
| C(26)-Yb(1)-C(24) | 49.73(6)  |
| C(33)-Yb(1)-C(24) | 142.52(6) |
| N(1)-Yb(1)-C(36)  | 86.16(6)  |
| N(2)-Yb(1)-C(36)  | 86.84(5)  |
| C(34)-Yb(1)-C(36) | 48.91(6)  |
| C(25)-Yb(1)-C(36) | 129.49(8) |
| C(35)-Yb(1)-C(36) | 29.72(6)  |
| C(26)-Yb(1)-C(36) | 114.18(6) |
| C(33)-Yb(1)-C(36) | 48.62(6)  |
| C(24)-Yb(1)-C(36) | 159.16(6) |
| N(1)-Yb(1)-C(27)  | 144.49(6) |
| N(2)-Yb(1)-C(27)  | 123.71(5) |
| C(34)-Yb(1)-C(27) | 79.89(6)  |
| C(25)-Yb(1)-C(27) | 48.63(5)  |

## Electronic Supporting Information

|                   |           |
|-------------------|-----------|
| C(35)-Yb(1)-C(27) | 96.82(6)  |
| C(26)-Yb(1)-C(27) | 29.67(6)  |
| C(33)-Yb(1)-C(27) | 96.71(6)  |
| C(24)-Yb(1)-C(27) | 48.95(6)  |
| C(36)-Yb(1)-C(27) | 125.75(6) |
| N(1)-Yb(1)-C(32)  | 74.14(5)  |
| N(2)-Yb(1)-C(32)  | 105.49(5) |
| C(34)-Yb(1)-C(32) | 48.27(6)  |
| C(25)-Yb(1)-C(32) | 155.85(8) |
| C(35)-Yb(1)-C(32) | 48.79(6)  |
| C(26)-Yb(1)-C(32) | 130.53(6) |
| C(33)-Yb(1)-C(32) | 29.04(7)  |
| C(24)-Yb(1)-C(32) | 170.06(6) |
| C(36)-Yb(1)-C(32) | 29.13(6)  |
| C(27)-Yb(1)-C(32) | 125.08(6) |
| N(1)-Yb(1)-C(23)  | 116.35(5) |
| N(2)-Yb(1)-C(23)  | 112.86(5) |
| C(34)-Yb(1)-C(23) | 105.77(6) |
| C(25)-Yb(1)-C(23) | 48.12(7)  |
| C(35)-Yb(1)-C(23) | 126.02(6) |
| C(26)-Yb(1)-C(23) | 48.70(6)  |
| C(33)-Yb(1)-C(23) | 113.40(6) |
| C(24)-Yb(1)-C(23) | 29.28(6)  |
| C(36)-Yb(1)-C(23) | 154.20(6) |
| C(27)-Yb(1)-C(23) | 29.23(6)  |
| C(32)-Yb(1)-C(23) | 141.28(6) |

**Table S3.** Anisotropic displacement parameters ( $\text{\AA}^2 \times 10^3$ ) for **4**. The anisotropic displacement factor exponent takes the form:  $-2\pi^2 [ h^2 a^{*2} U^{11} + \dots + 2 h k a^* b^* U^{12} ]$

|      | U <sup>11</sup> | U <sup>22</sup> | U <sup>33</sup> | U <sup>23</sup> | U <sup>13</sup> | U <sup>12</sup> |
|------|-----------------|-----------------|-----------------|-----------------|-----------------|-----------------|
| C(1) | 17(1)           | 16(1)           | 19(1)           | -1(1)           | -3(1)           | 1(1)            |
| C(2) | 22(1)           | 16(1)           | 25(1)           | -3(1)           | -3(1)           | 1(1)            |
| C(3) | 26(1)           | 13(1)           | 26(1)           | 0(1)            | -7(1)           | -1(1)           |
| C(4) | 25(1)           | 17(1)           | 23(1)           | 3(1)            | -2(1)           | -4(1)           |

## Electronic Supporting Information

|       |        |        |       |        |        |        |
|-------|--------|--------|-------|--------|--------|--------|
| C(5)  | 19(1)  | 13(1)  | 18(1) | 2(1)   | -3(1)  | -2(1)  |
| C(6)  | 27(1)  | 19(1)  | 23(1) | 2(1)   | 5(1)   | -4(1)  |
| C(7)  | 50(1)  | 23(1)  | 59(2) | -4(1)  | 28(1)  | -7(1)  |
| C(8)  | 48(1)  | 36(1)  | 79(2) | -9(1)  | 44(1)  | -12(1) |
| C(9)  | 39(1)  | 30(1)  | 45(1) | -4(1)  | 23(1)  | 0(1)   |
| C(10) | 17(1)  | 19(1)  | 18(1) | -5(1)  | -1(1)  | 1(1)   |
| C(11) | 17(1)  | 15(1)  | 19(1) | 0(1)   | 3(1)   | 2(1)   |
| C(12) | 19(1)  | 23(1)  | 30(1) | 3(1)   | 0(1)   | 0(1)   |
| C(13) | 19(1)  | 43(1)  | 32(1) | 3(1)   | 0(1)   | -6(1)  |
| C(14) | 25(1)  | 33(1)  | 37(1) | 5(1)   | 7(1)   | -7(1)  |
| C(15) | 33(1)  | 24(1)  | 23(1) | 4(1)   | 8(1)   | 0(1)   |
| C(16) | 25(1)  | 16(1)  | 20(1) | 0(1)   | 2(1)   | 0(1)   |
| C(17) | 19(1)  | 36(1)  | 26(1) | 1(1)   | -2(1)  | -5(1)  |
| C(18) | 42(1)  | 45(1)  | 36(1) | 14(1)  | -10(1) | -2(1)  |
| C(19) | 30(1)  | 52(2)  | 30(1) | -1(1)  | -1(1)  | -10(1) |
| C(20) | 23(1)  | 30(1)  | 23(1) | 4(1)   | 2(1)   | -1(1)  |
| C(21) | 37(1)  | 39(1)  | 39(1) | 14(1)  | 0(1)   | 2(1)   |
| C(22) | 35(1)  | 46(2)  | 38(1) | -2(1)  | 7(1)   | -8(1)  |
| C(23) | 25(1)  | 10(1)  | 24(1) | -3(1)  | 3(1)   | -1(1)  |
| C(24) | 19(1)  | 12(1)  | 31(1) | -4(1)  | -3(1)  | 0(1)   |
| C(25) | 22(1)  | 12(1)  | 33(1) | -6(2)  | 11(1)  | -2(1)  |
| C(26) | 34(1)  | 9(1)   | 24(1) | 1(1)   | 1(1)   | -1(1)  |
| C(27) | 20(1)  | 12(1)  | 29(1) | -4(1)  | -1(1)  | 0(1)   |
| C(28) | 25(1)  | 22(1)  | 39(1) | -6(1)  | -6(1)  | 1(1)   |
| C(29) | 22(1)  | 28(1)  | 54(1) | -15(1) | 8(1)   | 0(1)   |
| C(30) | 31(1)  | 26(1)  | 35(1) | -12(1) | 13(1)  | -9(1)  |
| C(31) | 32(1)  | 19(1)  | 26(1) | -5(1)  | 2(1)   | -6(1)  |
| C(32) | 18(1)  | 29(1)  | 26(1) | 0(1)   | -9(1)  | -5(1)  |
| C(33) | 15(1)  | 43(1)  | 32(1) | -3(1)  | -3(1)  | -2(1)  |
| C(34) | 19(1)  | 32(1)  | 36(1) | -7(1)  | -12(1) | 10(1)  |
| C(35) | 22(1)  | 32(1)  | 22(1) | 9(1)   | -12(1) | -3(1)  |
| C(36) | 22(1)  | 25(1)  | 21(1) | -2(1)  | -10(1) | -4(1)  |
| C(37) | 25(1)  | 29(1)  | 24(1) | -6(1)  | -6(1)  | -4(1)  |
| C(38) | 33(1)  | 26(1)  | 40(1) | -10(1) | -11(1) | 2(1)   |
| C(39) | 45(1)  | 20(1)  | 43(1) | 0(1)   | -19(1) | -9(1)  |
| C(40) | 33(1)  | 35(1)  | 29(1) | 8(1)   | -10(1) | -17(1) |
| C(41) | 104(2) | 224(4) | 56(3) | 17(3)  | -8(2)  | 129(3) |
| C(42) | 64(2)  | 87(2)  | 76(2) | 35(2)  | -14(2) | 11(2)  |

## Electronic Supporting Information

|       |        |         |       |       |        |        |
|-------|--------|---------|-------|-------|--------|--------|
| C(43) | 105(4) | 92(3)   | 78(3) | 23(2) | -10(3) | 21(3)  |
| C(44) | 121(3) | 65(2)   | 52(2) | 20(2) | -20(2) | 0(2)   |
| C(45) | 84(2)  | 72(2)   | 62(2) | 7(2)  | -35(2) | 18(2)  |
| C(46) | 57(2)  | 145(4)  | 86(3) | 48(3) | -28(2) | 16(2)  |
| C(47) | 429(7) | 553(10) | 90(5) | 25(5) | 18(5)  | 429(7) |
| N(1)  | 16(1)  | 14(1)   | 17(1) | -1(1) | 0(1)   | -2(1)  |
| N(2)  | 19(1)  | 13(1)   | 16(1) | 0(1)  | 1(1)   | -1(1)  |
| S(1)  | 25(1)  | 17(1)   | 26(1) | 1(1)  | 6(1)   | 0(1)   |
| Yb(1) | 14(1)  | 13(1)   | 17(1) | 0(1)  | -1(1)  | 1(1)   |

**Table S4.** (Selected) torsion angles [°] for **4**.

|                     |         |
|---------------------|---------|
| N(1)-C(5)-C(6)-S(1) | 16.8(2) |
|---------------------|---------|

### Crystallographic data and tables for **5** (CCDC: 795224)

**Table S5.** Atomic coordinates ( $\times 10^4$ ) and equivalent isotropic displacement parameters ( $\text{\AA}^2 \times 10^3$ ) for **5**.  $U(\text{eq})$  is defined as one third of the trace of the orthogonalized  $U^{ij}$  tensor.

|       | x        | y       | z       | $U(\text{eq})$ |
|-------|----------|---------|---------|----------------|
| C(1)  | 11749(9) | 8075(3) | 6413(7) | 32(2)          |
| C(2)  | 12935(7) | 7849(3) | 6658(7) | 29(2)          |
| C(3)  | 13891(7) | 7963(3) | 5971(7) | 37(2)          |
| C(4)  | 13700(7) | 8294(3) | 5080(6) | 36(2)          |
| C(5)  | 12434(6) | 8494(2) | 4845(6) | 20(2)          |
| C(6)  | 12112(7) | 8836(2) | 3862(6) | 23(2)          |
| C(7)  | 12825(8) | 9052(3) | 3103(7) | 36(2)          |
| C(8)  | 11946(8) | 9324(3) | 2305(8) | 42(2)          |
| C(9)  | 10758(8) | 9248(3) | 2618(7) | 35(2)          |
| C(10) | 10634(8) | 7936(3) | 7028(7) | 31(2)          |

## Electronic Supporting Information

|       |           |         |          |       |
|-------|-----------|---------|----------|-------|
| C(11) | 8446(7)   | 7856(3) | 7284(6)  | 24(2) |
| C(12) | 8081(8)   | 7401(3) | 6823(7)  | 29(2) |
| C(13) | 7015(13)  | 7175(5) | 7207(12) | 33(4) |
| C(14) | 6340(8)   | 7396(3) | 8056(8)  | 38(2) |
| C(15) | 6729(13)  | 7840(5) | 8507(13) | 38(4) |
| C(16) | 7763(7)   | 8085(3) | 8141(7)  | 28(2) |
| C(17) | 8804(8)   | 7136(3) | 5914(6)  | 37(2) |
| C(18) | 7875(9)   | 6903(3) | 4939(7)  | 53(3) |
| C(19) | 9759(8)   | 6760(3) | 6467(8)  | 51(2) |
| C(20) | 8214(8)   | 8568(3) | 8675(7)  | 41(2) |
| C(21) | 9057(12)  | 8487(3) | 9851(7)  | 77(4) |
| C(22) | 7085(10)  | 8913(3) | 8806(10) | 80(3) |
| C(23) | 10489(7)  | 9454(3) | 7076(7)  | 29(2) |
| C(24) | 9151(8)   | 9577(2) | 6835(7)  | 31(2) |
| C(25) | 8906(12)  | 9799(4) | 5730(10) | 35(3) |
| C(26) | 10071(14) | 9806(4) | 5219(10) | 42(3) |
| C(27) | 11075(8)  | 9610(3) | 6043(7)  | 32(2) |
| C(28) | 12474(10) | 9564(4) | 6065(11) | 48(3) |
| C(29) | 13168(9)  | 9381(3) | 7032(10) | 48(3) |
| C(30) | 12608(10) | 9232(3) | 8033(9)  | 48(3) |
| C(31) | 11278(13) | 9277(4) | 8046(13) | 43(4) |
| C(32) | 6676(7)   | 8897(3) | 4437(7)  | 38(2) |
| C(33) | 7007(12)  | 8431(5) | 4848(12) | 37(4) |
| C(34) | 7713(10)  | 8202(4) | 4110(9)  | 41(3) |
| C(35) | 7949(7)   | 8510(3) | 3200(8)  | 46(2) |
| C(36) | 7277(8)   | 8945(3) | 3343(7)  | 37(2) |
| C(37) | 7055(13)  | 9380(5) | 2659(13) | 61(5) |
| C(38) | 6277(12)  | 9733(4) | 3037(14) | 81(4) |
| C(39) | 5701(12)  | 9693(5) | 4091(16) | 73(5) |
| C(40) | 5890(8)   | 9290(4) | 4797(9)  | 50(3) |
| N(1)  | 11481(10) | 8393(3) | 5498(8)  | 22(2) |
| N(2)  | 9478(6)   | 8112(2) | 6830(5)  | 28(2) |
| O(1)  | 10829(4)  | 8941(2) | 3571(4)  | 29(1) |
| Yb(1) | 9349(1)   | 8856(1) | 5250(1)  | 26(1) |

---



## Electronic Supporting Information

**Table S6.** Bond lengths [Å] and angles [°] for **5**.

---

|             |           |
|-------------|-----------|
| C(1)-N(1)   | 1.360(12) |
| C(1)-C(2)   | 1.370(11) |
| C(1)-C(10)  | 1.466(12) |
| C(2)-C(3)   | 1.365(10) |
| C(2)-H(2)   | 0.9500    |
| C(3)-C(4)   | 1.356(10) |
| C(3)-H(3)   | 0.9500    |
| C(4)-C(5)   | 1.412(9)  |
| C(4)-H(4)   | 0.9500    |
| C(5)-N(1)   | 1.329(12) |
| C(5)-C(6)   | 1.467(9)  |
| C(6)-C(7)   | 1.337(10) |
| C(6)-O(1)   | 1.354(8)  |
| C(7)-C(8)   | 1.416(11) |
| C(7)-H(7)   | 0.9500    |
| C(8)-C(9)   | 1.332(10) |
| C(8)-H(8)   | 0.9500    |
| C(9)-O(1)   | 1.367(8)  |
| C(9)-H(9)   | 0.9500    |
| C(10)-N(2)  | 1.281(9)  |
| C(10)-H(10) | 0.9500    |
| C(11)-C(12) | 1.390(10) |
| C(11)-C(16) | 1.416(10) |
| C(11)-N(2)  | 1.424(8)  |
| C(12)-C(13) | 1.378(15) |
| C(12)-C(17) | 1.528(10) |
| C(13)-C(14) | 1.395(16) |
| C(13)-H(13) | 0.9500    |
| C(14)-C(15) | 1.366(16) |
| C(14)-H(14) | 0.9500    |
| C(15)-C(16) | 1.367(15) |
| C(15)-H(15) | 0.9500    |
| C(16)-C(20) | 1.510(10) |
| C(17)-C(19) | 1.513(10) |
| C(17)-C(18) | 1.515(10) |
| C(17)-H(17) | 1.0000    |

## Electronic Supporting Information

|              |           |
|--------------|-----------|
| C(18)-H(18A) | 0.9800    |
| C(18)-H(18B) | 0.9800    |
| C(18)-H(18C) | 0.9800    |
| C(19)-H(19A) | 0.9800    |
| C(19)-H(19B) | 0.9800    |
| C(19)-H(19C) | 0.9800    |
| C(20)-C(21)  | 1.518(10) |
| C(20)-C(22)  | 1.524(11) |
| C(20)-H(20)  | 1.0000    |
| C(21)-H(21A) | 0.9800    |
| C(21)-H(21B) | 0.9800    |
| C(21)-H(21C) | 0.9800    |
| C(22)-H(22A) | 0.9800    |
| C(22)-H(22B) | 0.9800    |
| C(22)-H(22C) | 0.9800    |
| C(23)-C(31)  | 1.377(15) |
| C(23)-C(24)  | 1.414(10) |
| C(23)-C(27)  | 1.447(11) |
| C(23)-Yb(1)  | 2.791(7)  |
| C(24)-C(25)  | 1.390(13) |
| C(24)-Yb(1)  | 2.701(7)  |
| C(24)-H(24)  | 0.9500    |
| C(25)-C(26)  | 1.395(10) |
| C(25)-Yb(1)  | 2.701(12) |
| C(25)-H(25)  | 0.9500    |
| C(26)-C(27)  | 1.415(14) |
| C(26)-Yb(1)  | 2.719(12) |
| C(26)-H(26)  | 0.9500    |
| C(27)-C(28)  | 1.444(13) |
| C(27)-Yb(1)  | 2.810(7)  |
| C(28)-C(29)  | 1.333(14) |
| C(28)-H(28)  | 0.9500    |
| C(29)-C(30)  | 1.397(13) |
| C(29)-H(29)  | 0.9500    |
| C(30)-C(31)  | 1.379(16) |
| C(30)-H(30)  | 0.9500    |
| C(31)-H(31)  | 0.9500    |
| C(32)-C(33)  | 1.393(14) |

## Electronic Supporting Information

|                 |           |
|-----------------|-----------|
| C(32)-C(40)     | 1.440(11) |
| C(32)-C(36)     | 1.459(11) |
| C(32)-Yb(1)     | 2.800(7)  |
| C(33)-C(34)     | 1.332(17) |
| C(33)-Yb(1)     | 2.672(12) |
| C(33)-H(33)     | 0.9500    |
| C(34)-C(35)     | 1.381(12) |
| C(34)-Yb(1)     | 2.689(9)  |
| C(34)-H(34)     | 0.9500    |
| C(35)-C(36)     | 1.401(10) |
| C(35)-Yb(1)     | 2.754(8)  |
| C(35)-H(35)     | 0.9500    |
| C(36)-C(37)     | 1.430(15) |
| C(36)-Yb(1)     | 2.860(7)  |
| C(37)-C(38)     | 1.362(18) |
| C(37)-H(37)     | 0.9500    |
| C(38)-C(39)     | 1.403(18) |
| C(38)-H(38)     | 0.9500    |
| C(39)-C(40)     | 1.368(15) |
| C(39)-H(39)     | 0.9500    |
| C(40)-H(40)     | 0.9500    |
| N(1)-Yb(1)      | 2.527(10) |
| N(2)-Yb(1)      | 2.714(6)  |
| O(1)-Yb(1)      | 2.592(5)  |
|                 |           |
| N(1)-C(1)-C(2)  | 122.7(9)  |
| N(1)-C(1)-C(10) | 115.7(9)  |
| C(2)-C(1)-C(10) | 121.1(8)  |
| C(3)-C(2)-C(1)  | 117.9(7)  |
| C(3)-C(2)-H(2)  | 121.0     |
| C(1)-C(2)-H(2)  | 121.0     |
| C(4)-C(3)-C(2)  | 122.0(7)  |
| C(4)-C(3)-H(3)  | 119.0     |
| C(2)-C(3)-H(3)  | 119.0     |
| C(3)-C(4)-C(5)  | 116.7(7)  |
| C(3)-C(4)-H(4)  | 121.6     |
| C(5)-C(4)-H(4)  | 121.6     |
| N(1)-C(5)-C(4)  | 122.8(7)  |

## Electronic Supporting Information

|                   |           |
|-------------------|-----------|
| N(1)-C(5)-C(6)    | 116.3(7)  |
| C(4)-C(5)-C(6)    | 120.9(6)  |
| C(7)-C(6)-O(1)    | 110.2(6)  |
| C(7)-C(6)-C(5)    | 133.1(7)  |
| O(1)-C(6)-C(5)    | 116.5(6)  |
| C(6)-C(7)-C(8)    | 106.7(7)  |
| C(6)-C(7)-H(7)    | 126.6     |
| C(8)-C(7)-H(7)    | 126.6     |
| C(9)-C(8)-C(7)    | 106.5(7)  |
| C(9)-C(8)-H(8)    | 126.8     |
| C(7)-C(8)-H(8)    | 126.8     |
| C(8)-C(9)-O(1)    | 110.2(7)  |
| C(8)-C(9)-H(9)    | 124.9     |
| O(1)-C(9)-H(9)    | 124.9     |
| N(2)-C(10)-C(1)   | 125.7(8)  |
| N(2)-C(10)-H(10)  | 117.1     |
| C(1)-C(10)-H(10)  | 117.1     |
| C(12)-C(11)-C(16) | 121.6(7)  |
| C(12)-C(11)-N(2)  | 119.3(7)  |
| C(16)-C(11)-N(2)  | 118.9(7)  |
| C(13)-C(12)-C(11) | 118.5(9)  |
| C(13)-C(12)-C(17) | 118.1(9)  |
| C(11)-C(12)-C(17) | 123.4(7)  |
| C(12)-C(13)-C(14) | 120.3(11) |
| C(12)-C(13)-H(13) | 119.8     |
| C(14)-C(13)-H(13) | 119.8     |
| C(15)-C(14)-C(13) | 120.0(12) |
| C(15)-C(14)-H(14) | 120.0     |
| C(13)-C(14)-H(14) | 120.0     |
| C(14)-C(15)-C(16) | 122.1(13) |
| C(14)-C(15)-H(15) | 118.9     |
| C(16)-C(15)-H(15) | 118.9     |
| C(15)-C(16)-C(11) | 117.4(9)  |
| C(15)-C(16)-C(20) | 121.6(10) |
| C(11)-C(16)-C(20) | 120.9(7)  |
| C(19)-C(17)-C(18) | 109.5(7)  |
| C(19)-C(17)-C(12) | 113.1(6)  |
| C(18)-C(17)-C(12) | 112.2(7)  |

## Electronic Supporting Information

|                     |          |
|---------------------|----------|
| C(19)-C(17)-H(17)   | 107.2    |
| C(18)-C(17)-H(17)   | 107.2    |
| C(12)-C(17)-H(17)   | 107.2    |
| C(17)-C(18)-H(18A)  | 109.5    |
| C(17)-C(18)-H(18B)  | 109.5    |
| H(18A)-C(18)-H(18B) | 109.5    |
| C(17)-C(18)-H(18C)  | 109.5    |
| H(18A)-C(18)-H(18C) | 109.5    |
| H(18B)-C(18)-H(18C) | 109.5    |
| C(17)-C(19)-H(19A)  | 109.5    |
| C(17)-C(19)-H(19B)  | 109.5    |
| H(19A)-C(19)-H(19B) | 109.5    |
| C(17)-C(19)-H(19C)  | 109.5    |
| H(19A)-C(19)-H(19C) | 109.5    |
| H(19B)-C(19)-H(19C) | 109.5    |
| C(16)-C(20)-C(21)   | 109.9(7) |
| C(16)-C(20)-C(22)   | 112.7(7) |
| C(21)-C(20)-C(22)   | 111.6(8) |
| C(16)-C(20)-H(20)   | 107.4    |
| C(21)-C(20)-H(20)   | 107.4    |
| C(22)-C(20)-H(20)   | 107.4    |
| C(20)-C(21)-H(21A)  | 109.5    |
| C(20)-C(21)-H(21B)  | 109.5    |
| H(21A)-C(21)-H(21B) | 109.5    |
| C(20)-C(21)-H(21C)  | 109.5    |
| H(21A)-C(21)-H(21C) | 109.5    |
| H(21B)-C(21)-H(21C) | 109.5    |
| C(20)-C(22)-H(22A)  | 109.5    |
| C(20)-C(22)-H(22B)  | 109.5    |
| H(22A)-C(22)-H(22B) | 109.5    |
| C(20)-C(22)-H(22C)  | 109.5    |
| H(22A)-C(22)-H(22C) | 109.5    |
| H(22B)-C(22)-H(22C) | 109.5    |
| C(31)-C(23)-C(24)   | 135.0(9) |
| C(31)-C(23)-C(27)   | 119.2(9) |
| C(24)-C(23)-C(27)   | 105.5(7) |
| C(31)-C(23)-Yb(1)   | 122.6(6) |
| C(24)-C(23)-Yb(1)   | 71.6(4)  |

## Electronic Supporting Information

|                   |           |
|-------------------|-----------|
| C(27)-C(23)-Yb(1) | 75.7(4)   |
| C(25)-C(24)-C(23) | 110.2(8)  |
| C(25)-C(24)-Yb(1) | 75.1(6)   |
| C(23)-C(24)-Yb(1) | 78.7(4)   |
| C(25)-C(24)-H(24) | 124.9     |
| C(23)-C(24)-H(24) | 124.9     |
| Yb(1)-C(24)-H(24) | 113.3     |
| C(24)-C(25)-C(26) | 108.1(10) |
| C(24)-C(25)-Yb(1) | 75.1(6)   |
| C(26)-C(25)-Yb(1) | 75.8(9)   |
| C(24)-C(25)-H(25) | 126.0     |
| C(26)-C(25)-H(25) | 126.0     |
| Yb(1)-C(25)-H(25) | 115.4     |
| C(25)-C(26)-C(27) | 108.5(11) |
| C(25)-C(26)-Yb(1) | 74.4(9)   |
| C(27)-C(26)-Yb(1) | 78.8(6)   |
| C(25)-C(26)-H(26) | 125.7     |
| C(27)-C(26)-H(26) | 125.7     |
| Yb(1)-C(26)-H(26) | 113.4     |
| C(26)-C(27)-C(28) | 134.0(10) |
| C(26)-C(27)-C(23) | 107.7(9)  |
| C(28)-C(27)-C(23) | 118.3(8)  |
| C(26)-C(27)-Yb(1) | 71.7(6)   |
| C(28)-C(27)-Yb(1) | 122.1(6)  |
| C(23)-C(27)-Yb(1) | 74.3(4)   |
| C(29)-C(28)-C(27) | 118.9(10) |
| C(29)-C(28)-H(28) | 120.6     |
| C(27)-C(28)-H(28) | 120.6     |
| C(28)-C(29)-C(30) | 123.1(10) |
| C(28)-C(29)-H(29) | 118.4     |
| C(30)-C(29)-H(29) | 118.4     |
| C(31)-C(30)-C(29) | 119.5(10) |
| C(31)-C(30)-H(30) | 120.3     |
| C(29)-C(30)-H(30) | 120.3     |
| C(23)-C(31)-C(30) | 121.0(12) |
| C(23)-C(31)-H(31) | 119.5     |
| C(30)-C(31)-H(31) | 119.5     |
| C(33)-C(32)-C(40) | 136.1(10) |

## Electronic Supporting Information

|                   |           |
|-------------------|-----------|
| C(33)-C(32)-C(36) | 104.8(8)  |
| C(40)-C(32)-C(36) | 119.0(8)  |
| C(33)-C(32)-Yb(1) | 70.2(6)   |
| C(40)-C(32)-Yb(1) | 120.1(5)  |
| C(36)-C(32)-Yb(1) | 77.3(4)   |
| C(34)-C(33)-C(32) | 110.8(11) |
| C(34)-C(33)-Yb(1) | 76.3(7)   |
| C(32)-C(33)-Yb(1) | 80.4(6)   |
| C(34)-C(33)-H(33) | 124.6     |
| C(32)-C(33)-H(33) | 124.6     |
| Yb(1)-C(33)-H(33) | 110.8     |
| C(33)-C(34)-C(35) | 109.8(10) |
| C(33)-C(34)-Yb(1) | 74.9(7)   |
| C(35)-C(34)-Yb(1) | 77.9(5)   |
| C(33)-C(34)-H(34) | 125.1     |
| C(35)-C(34)-H(34) | 125.1     |
| Yb(1)-C(34)-H(34) | 114.1     |
| C(34)-C(35)-C(36) | 107.6(8)  |
| C(34)-C(35)-Yb(1) | 72.7(5)   |
| C(36)-C(35)-Yb(1) | 79.8(5)   |
| C(34)-C(35)-H(35) | 126.2     |
| C(36)-C(35)-H(35) | 126.2     |
| Yb(1)-C(35)-H(35) | 113.7     |
| C(35)-C(36)-C(37) | 134.4(10) |
| C(35)-C(36)-C(32) | 106.8(7)  |
| C(37)-C(36)-C(32) | 118.7(9)  |
| C(35)-C(36)-Yb(1) | 71.4(4)   |
| C(37)-C(36)-Yb(1) | 122.5(7)  |
| C(32)-C(36)-Yb(1) | 72.8(4)   |
| C(38)-C(37)-C(36) | 119.2(12) |
| C(38)-C(37)-H(37) | 120.4     |
| C(36)-C(37)-H(37) | 120.4     |
| C(37)-C(38)-C(39) | 122.6(11) |
| C(37)-C(38)-H(38) | 118.7     |
| C(39)-C(38)-H(38) | 118.7     |
| C(40)-C(39)-C(38) | 121.2(12) |
| C(40)-C(39)-H(39) | 119.4     |
| C(38)-C(39)-H(39) | 119.4     |

## Electronic Supporting Information

|                   |            |
|-------------------|------------|
| C(39)-C(40)-C(32) | 119.2(11)  |
| C(39)-C(40)-H(40) | 120.4      |
| C(32)-C(40)-H(40) | 120.4      |
| C(5)-N(1)-C(1)    | 117.7(9)   |
| C(5)-N(1)-Yb(1)   | 121.6(6)   |
| C(1)-N(1)-Yb(1)   | 120.2(7)   |
| C(10)-N(2)-C(11)  | 118.0(6)   |
| C(10)-N(2)-Yb(1)  | 111.8(5)   |
| C(11)-N(2)-Yb(1)  | 129.4(4)   |
| C(6)-O(1)-C(9)    | 106.4(6)   |
| C(6)-O(1)-Yb(1)   | 116.5(4)   |
| C(9)-O(1)-Yb(1)   | 131.0(4)   |
| N(1)-Yb(1)-O(1)   | 62.9(2)    |
| N(1)-Yb(1)-C(33)  | 123.6(2)   |
| O(1)-Yb(1)-C(33)  | 120.9(3)   |
| N(1)-Yb(1)-C(34)  | 101.6(3)   |
| O(1)-Yb(1)-C(34)  | 95.6(3)    |
| C(33)-Yb(1)-C(34) | 28.8(4)    |
| N(1)-Yb(1)-C(24)  | 115.6(3)   |
| O(1)-Yb(1)-C(24)  | 121.5(2)   |
| C(33)-Yb(1)-C(24) | 107.2(4)   |
| C(34)-Yb(1)-C(24) | 135.9(3)   |
| N(1)-Yb(1)-C(25)  | 128.9(3)   |
| O(1)-Yb(1)-C(25)  | 101.0(3)   |
| C(33)-Yb(1)-C(25) | 106.5(4)   |
| C(34)-Yb(1)-C(25) | 129.0(3)   |
| C(24)-Yb(1)-C(25) | 29.8(3)    |
| N(1)-Yb(1)-N(2)   | 64.8(2)    |
| O(1)-Yb(1)-N(2)   | 124.54(17) |
| C(33)-Yb(1)-N(2)  | 75.7(3)    |
| C(34)-Yb(1)-N(2)  | 77.9(2)    |
| C(24)-Yb(1)-N(2)  | 96.7(2)    |
| C(25)-Yb(1)-N(2)  | 126.0(3)   |
| N(1)-Yb(1)-C(26)  | 104.5(4)   |
| O(1)-Yb(1)-C(26)  | 73.6(3)    |
| C(33)-Yb(1)-C(26) | 131.5(4)   |
| C(34)-Yb(1)-C(26) | 142.6(3)   |
| C(24)-Yb(1)-C(26) | 49.2(3)    |



## Electronic Supporting Information

|                   |          |
|-------------------|----------|
| C(25)-Yb(1)-C(26) | 29.8(2)  |
| N(2)-Yb(1)-C(26)  | 137.9(3) |
| N(1)-Yb(1)-C(35)  | 106.2(3) |
| O(1)-Yb(1)-C(35)  | 72.8(2)  |
| C(33)-Yb(1)-C(35) | 48.3(4)  |
| C(34)-Yb(1)-C(35) | 29.4(3)  |
| C(24)-Yb(1)-C(35) | 137.9(2) |
| C(25)-Yb(1)-C(35) | 114.7(3) |
| N(2)-Yb(1)-C(35)  | 106.0(2) |
| C(26)-Yb(1)-C(35) | 115.9(3) |
| N(1)-Yb(1)-C(23)  | 86.2(3)  |
| O(1)-Yb(1)-C(23)  | 105.1(2) |
| C(33)-Yb(1)-C(23) | 132.5(4) |
| C(34)-Yb(1)-C(23) | 159.2(3) |
| C(24)-Yb(1)-C(23) | 29.8(2)  |
| C(25)-Yb(1)-C(23) | 49.5(3)  |
| N(2)-Yb(1)-C(23)  | 88.4(2)  |
| C(26)-Yb(1)-C(23) | 49.6(3)  |
| C(35)-Yb(1)-C(23) | 163.9(2) |
| N(1)-Yb(1)-C(32)  | 149.8(3) |
| O(1)-Yb(1)-C(32)  | 113.4(2) |
| C(33)-Yb(1)-C(32) | 29.4(3)  |
| C(34)-Yb(1)-C(32) | 48.2(3)  |
| C(24)-Yb(1)-C(32) | 92.2(2)  |
| C(25)-Yb(1)-C(32) | 81.1(3)  |
| N(2)-Yb(1)-C(32)  | 102.4(2) |
| C(26)-Yb(1)-C(32) | 102.6(3) |
| C(35)-Yb(1)-C(32) | 48.8(2)  |
| C(23)-Yb(1)-C(32) | 122.0(2) |
| N(1)-Yb(1)-C(27)  | 80.1(3)  |
| O(1)-Yb(1)-C(27)  | 76.3(2)  |
| C(33)-Yb(1)-C(27) | 154.5(4) |
| C(34)-Yb(1)-C(27) | 169.9(3) |
| C(24)-Yb(1)-C(27) | 48.8(2)  |
| C(25)-Yb(1)-C(27) | 48.8(3)  |
| N(2)-Yb(1)-C(27)  | 111.6(2) |
| C(26)-Yb(1)-C(27) | 29.6(3)  |
| C(35)-Yb(1)-C(27) | 140.6(3) |

## Electronic Supporting Information

|                   |          |
|-------------------|----------|
| C(23)-Yb(1)-C(27) | 29.9(2)  |
| C(32)-Yb(1)-C(27) | 129.5(2) |

---

**Table S7.** Anisotropic displacement parameters ( $\text{\AA}^2 \times 10^3$ ) for **5**. The anisotropic displacement factor exponent takes the form:  $-2\pi^2 [h^2 a^{*2} U^{11} + \dots + 2 h k a^* b^* U^{12}]$

---

|       | U <sup>11</sup> | U <sup>22</sup> | U <sup>33</sup> | U <sup>23</sup> | U <sup>13</sup> | U <sup>12</sup> |
|-------|-----------------|-----------------|-----------------|-----------------|-----------------|-----------------|
| C(1)  | 36(6)           | 41(6)           | 18(5)           | -3(4)           | 2(4)            | -13(5)          |
| C(2)  | 18(5)           | 40(5)           | 28(5)           | 2(4)            | 3(4)            | 7(4)            |
| C(3)  | 22(5)           | 29(5)           | 63(6)           | 8(4)            | 13(4)           | 6(4)            |
| C(4)  | 53(5)           | 30(4)           | 28(5)           | 10(4)           | 20(5)           | 26(4)           |
| C(5)  | 16(4)           | 22(4)           | 24(4)           | 0(3)            | 5(3)            | 0(3)            |
| C(6)  | 24(4)           | 16(4)           | 29(4)           | -9(4)           | 3(3)            | -2(4)           |
| C(7)  | 38(5)           | 36(5)           | 38(5)           | -1(4)           | 24(4)           | 2(4)            |
| C(8)  | 53(6)           | 22(5)           | 57(6)           | 11(4)           | 30(5)           | 2(4)            |
| C(9)  | 45(6)           | 34(5)           | 24(5)           | 9(4)            | -1(4)           | 12(4)           |
| C(10) | 26(5)           | 38(5)           | 31(5)           | 0(4)            | 9(4)            | 0(4)            |
| C(11) | 16(4)           | 36(5)           | 22(4)           | 16(4)           | 2(3)            | 3(4)            |
| C(12) | 29(5)           | 32(5)           | 24(5)           | 4(4)            | -2(4)           | -9(4)           |
| C(13) | 40(9)           | 25(7)           | 35(8)           | 7(5)            | 7(6)            | 5(6)            |
| C(14) | 26(5)           | 43(6)           | 46(6)           | 22(5)           | 9(4)            | 2(5)            |
| C(15) | 29(8)           | 51(9)           | 34(7)           | 19(6)           | 1(6)            | 7(6)            |
| C(16) | 16(4)           | 39(5)           | 28(5)           | 6(4)            | 6(4)            | 0(4)            |
| C(17) | 49(6)           | 39(5)           | 23(5)           | 2(4)            | 9(4)            | -5(4)           |
| C(18) | 75(7)           | 41(5)           | 44(6)           | -2(5)           | 18(5)           | -29(5)          |
| C(19) | 62(6)           | 36(5)           | 61(6)           | 4(5)            | 28(5)           | 8(5)            |
| C(20) | 44(5)           | 45(5)           | 39(6)           | 1(4)            | 27(4)           | -6(4)           |
| C(21) | 132(12)         | 75(7)           | 26(6)           | -13(5)          | 23(7)           | -31(8)          |
| C(22) | 76(8)           | 48(6)           | 128(10)         | -10(7)          | 64(7)           | 2(6)            |
| C(23) | 25(5)           | 25(4)           | 35(5)           | -5(4)           | -4(4)           | -7(4)           |
| C(24) | 39(5)           | 20(4)           | 37(5)           | -11(4)          | 12(4)           | -2(4)           |
| C(25) | 45(7)           | 26(6)           | 34(7)           | -1(5)           | 8(6)            | 10(5)           |
| C(26) | 85(9)           | 16(5)           | 27(7)           | -6(5)           | 8(7)            | -3(6)           |
| C(27) | 40(5)           | 16(4)           | 41(6)           | -15(4)          | 9(4)            | -9(4)           |
| C(28) | 32(8)           | 42(7)           | 72(9)           | -31(6)          | 15(6)           | -16(6)          |

---

## Electronic Supporting Information

|       |       |        |         |        |        |        |
|-------|-------|--------|---------|--------|--------|--------|
| C(29) | 32(6) | 43(6)  | 68(8)   | -30(6) | 3(6)   | -1(5)  |
| C(30) | 47(7) | 38(6)  | 54(7)   | -16(5) | -21(6) | 4(5)   |
| C(31) | 47(8) | 25(6)  | 56(8)   | -10(5) | -1(6)  | 7(5)   |
| C(32) | 25(4) | 31(5)  | 57(6)   | -8(5)  | 1(4)   | -12(4) |
| C(33) | 16(6) | 57(9)  | 37(8)   | 37(6)  | 0(6)   | -3(6)  |
| C(34) | 38(7) | 39(6)  | 45(7)   | -3(5)  | -2(6)  | 4(5)   |
| C(35) | 25(5) | 73(7)  | 38(6)   | -22(5) | 2(4)   | -2(5)  |
| C(36) | 27(5) | 48(6)  | 33(5)   | 11(4)  | -11(4) | -2(4)  |
| C(37) | 41(9) | 81(12) | 54(9)   | 43(8)  | -23(7) | -22(8) |
| C(38) | 37(7) | 53(8)  | 143(13) | 46(8)  | -32(8) | -9(6)  |
| C(39) | 20(7) | 50(9)  | 144(15) | -18(9) | -8(8)  | 3(6)   |
| C(40) | 20(5) | 58(7)  | 71(8)   | -6(6)  | 8(5)   | 6(5)   |
| N(1)  | 28(5) | 18(5)  | 18(5)   | 5(4)   | -3(4)  | 2(4)   |
| N(2)  | 34(4) | 31(4)  | 20(4)   | 0(3)   | 10(3)  | 1(3)   |
| O(1)  | 29(3) | 37(3)  | 21(3)   | 1(2)   | 12(2)  | 5(3)   |
| Yb(1) | 24(1) | 26(1)  | 29(1)   | -2(1)  | 5(1)   | 0(1)   |

**Table S8.** Torsion angles [°] for **5**.

|                     |          |
|---------------------|----------|
| N(1)-C(5)-C(6)-O(1) | -12.6(9) |
|---------------------|----------|

### Crystallographic data and tables for **6** (CCDC: 794891)

**Table S9.** Atomic coordinates ( $\times 10^4$ ) and equivalent isotropic displacement parameters ( $\text{\AA}^2 \times 10^3$ ) for **6**.  $U(\text{eq})$  is defined as one third of the trace of the orthogonalized  $U^{ij}$  tensor.

|      | x       | y       | z        | $U(\text{eq})$ |
|------|---------|---------|----------|----------------|
| C(1) | 4090(5) | 1179(1) | -207(5)  | 15(1)          |
| C(2) | 2716(5) | 1168(1) | -1455(5) | 18(1)          |
| C(3) | 1579(6) | 1431(1) | -1700(5) | 20(1)          |
| C(4) | 1873(5) | 1695(1) | -687(5)  | 19(1)          |
| C(5) | 3296(5) | 1698(1) | 530(5)   | 14(1)          |

## Electronic Supporting Information

|       |          |         |          |       |
|-------|----------|---------|----------|-------|
| C(6)  | 3597(5)  | 1971(1) | 1655(5)  | 16(1) |
| C(7)  | 4341(5)  | 1875(1) | 3095(5)  | 19(1) |
| C(8)  | 4541(5)  | 2120(1) | 4156(5)  | 21(1) |
| C(9)  | 4008(5)  | 2463(1) | 3803(5)  | 22(1) |
| C(10) | 3287(5)  | 2566(1) | 2391(5)  | 24(1) |
| C(11) | 3080(5)  | 2320(1) | 1320(5)  | 22(1) |
| C(12) | 5234(6)  | 887(1)  | 161(5)   | 18(1) |
| C(13) | 7426(5)  | 553(1)  | 1572(5)  | 16(1) |
| C(14) | 7046(5)  | 308(1)  | 2386(5)  | 20(1) |
| C(15) | 7865(5)  | -17(1)  | 2721(5)  | 22(1) |
| C(16) | 9057(5)  | -85(1)  | 2311(5)  | 23(1) |
| C(17) | 9452(6)  | 169(1)  | 1536(5)  | 24(1) |
| C(18) | 8665(5)  | 493(1)  | 1155(5)  | 19(1) |
| C(19) | 5739(5)  | 370(1)  | 2890(5)  | 23(1) |
| C(20) | 6306(6)  | 292(1)  | 4485(5)  | 32(1) |
| C(21) | 4274(6)  | 150(2)  | 2040(6)  | 40(2) |
| C(22) | 9064(5)  | 763(1)  | 269(5)   | 21(1) |
| C(23) | 8164(6)  | 680(1)  | -1327(5) | 30(1) |
| C(24) | 10837(6) | 790(2)  | 677(6)   | 33(1) |
| C(25) | 9495(5)  | 1127(1) | 4787(5)  | 19(1) |
| C(26) | 8099(5)  | 1199(1) | 4985(5)  | 22(1) |
| C(27) | 8054(6)  | 1575(1) | 5164(5)  | 25(1) |
| C(28) | 9328(5)  | 1737(1) | 5015(4)  | 21(1) |
| C(29) | 10242(5) | 1466(1) | 4785(4)  | 19(1) |
| C(30) | 11691(6) | 1468(1) | 4617(5)  | 22(1) |
| C(31) | 12368(6) | 1150(2) | 4525(5)  | 26(1) |
| C(32) | 11649(6) | 820(2)  | 4557(5)  | 26(1) |
| C(33) | 10237(6) | 805(1)  | 4671(5)  | 24(1) |
| C(34) | 7784(5)  | 1765(1) | -70(5)   | 19(1) |
| C(35) | 9292(6)  | 1780(1) | 1141(5)  | 20(1) |
| C(36) | 9208(5)  | 2054(1) | 2028(5)  | 23(1) |
| C(37) | 7689(6)  | 2204(1) | 1478(5)  | 21(1) |
| C(38) | 6775(5)  | 2028(1) | 133(5)   | 19(1) |
| C(39) | 5233(5)  | 2084(1) | -945(5)  | 23(1) |
| C(40) | 4713(6)  | 1887(1) | -2169(5) | 25(1) |
| C(41) | 5700(6)  | 1623(1) | -2362(5) | 24(1) |
| C(42) | 7213(6)  | 1566(1) | -1351(5) | 21(1) |
| N(1)  | 4411(4)  | 1445(1) | 774(4)   | 12(1) |

## Electronic Supporting Information

|       |         |         |         |       |
|-------|---------|---------|---------|-------|
| N(2)  | 6593(5) | 890(1)  | 1222(4) | 16(1) |
| Yb(1) | 7422(1) | 1521(1) | 2344(1) | 17(1) |

---

**Table S10.** Bond lengths [Å] and angles [°] for **6**.

---

|             |          |
|-------------|----------|
| C(1)-N(1)   | 1.359(5) |
| C(1)-C(2)   | 1.380(6) |
| C(1)-C(12)  | 1.458(6) |
| C(2)-C(3)   | 1.388(6) |
| C(2)-H(2)   | 0.9500   |
| C(3)-C(4)   | 1.378(6) |
| C(3)-H(3)   | 0.9500   |
| C(4)-C(5)   | 1.388(6) |
| C(4)-H(4)   | 0.9500   |
| C(5)-N(1)   | 1.346(5) |
| C(5)-C(6)   | 1.482(6) |
| C(6)-C(11)  | 1.384(6) |
| C(6)-C(7)   | 1.396(6) |
| C(7)-C(8)   | 1.377(6) |
| C(7)-H(7)   | 0.9500   |
| C(8)-C(9)   | 1.371(6) |
| C(8)-H(8)   | 0.9500   |
| C(9)-C(10)  | 1.377(6) |
| C(9)-H(9)   | 0.9500   |
| C(10)-C(11) | 1.387(6) |
| C(10)-H(10) | 0.9500   |
| C(11)-H(11) | 0.9500   |
| C(12)-N(2)  | 1.276(6) |
| C(12)-H(12) | 0.9500   |
| C(13)-C(14) | 1.385(6) |
| C(13)-C(18) | 1.406(6) |
| C(13)-N(2)  | 1.443(5) |
| C(14)-C(15) | 1.398(6) |
| C(14)-C(19) | 1.527(6) |
| C(15)-C(16) | 1.366(6) |
| C(15)-H(15) | 0.9500   |

## Electronic Supporting Information

|              |          |
|--------------|----------|
| C(16)-C(17)  | 1.385(6) |
| C(16)-H(16)  | 0.9500   |
| C(17)-C(18)  | 1.385(6) |
| C(17)-H(17)  | 0.9500   |
| C(18)-C(22)  | 1.510(6) |
| C(19)-C(21)  | 1.516(6) |
| C(19)-C(20)  | 1.529(6) |
| C(19)-H(19)  | 1.0000   |
| C(20)-H(20A) | 0.9800   |
| C(20)-H(20B) | 0.9800   |
| C(20)-H(20C) | 0.9800   |
| C(21)-H(21A) | 0.9800   |
| C(21)-H(21B) | 0.9800   |
| C(21)-H(21C) | 0.9800   |
| C(22)-C(24)  | 1.522(6) |
| C(22)-C(23)  | 1.532(6) |
| C(22)-H(22)  | 1.0000   |
| C(23)-H(23A) | 0.9800   |
| C(23)-H(23B) | 0.9800   |
| C(23)-H(23C) | 0.9800   |
| C(24)-H(24A) | 0.9800   |
| C(24)-H(24B) | 0.9800   |
| C(24)-H(24C) | 0.9800   |
| C(25)-C(33)  | 1.417(7) |
| C(25)-C(26)  | 1.422(6) |
| C(25)-C(29)  | 1.445(6) |
| C(25)-Yb(1)  | 2.853(5) |
| C(26)-C(27)  | 1.420(7) |
| C(26)-Yb(1)  | 2.796(5) |
| C(26)-H(26)  | 0.9500   |
| C(27)-C(28)  | 1.394(6) |
| C(27)-Yb(1)  | 2.722(5) |
| C(27)-H(27)  | 0.9500   |
| C(28)-C(29)  | 1.404(6) |
| C(28)-Yb(1)  | 2.696(4) |
| C(28)-H(28)  | 0.9500   |
| C(29)-C(30)  | 1.428(6) |
| C(29)-Yb(1)  | 2.773(4) |

## Electronic Supporting Information

|                 |          |
|-----------------|----------|
| C(30)-C(31)     | 1.365(7) |
| C(30)-H(30)     | 0.9500   |
| C(31)-C(32)     | 1.412(7) |
| C(31)-H(31)     | 0.9500   |
| C(32)-C(33)     | 1.368(7) |
| C(32)-H(32)     | 0.9500   |
| C(33)-H(33)     | 0.9500   |
| C(34)-C(42)     | 1.411(6) |
| C(34)-C(35)     | 1.433(6) |
| C(34)-C(38)     | 1.434(6) |
| C(34)-Yb(1)     | 2.802(5) |
| C(35)-C(36)     | 1.398(7) |
| C(35)-Yb(1)     | 2.703(5) |
| C(35)-H(35)     | 0.9500   |
| C(36)-C(37)     | 1.398(6) |
| C(36)-Yb(1)     | 2.699(5) |
| C(36)-H(36)     | 0.9500   |
| C(37)-C(38)     | 1.445(6) |
| C(37)-Yb(1)     | 2.751(5) |
| C(37)-H(37)     | 0.9500   |
| C(38)-C(39)     | 1.412(6) |
| C(38)-Yb(1)     | 2.829(5) |
| C(39)-C(40)     | 1.364(7) |
| C(39)-H(39)     | 0.9500   |
| C(40)-C(41)     | 1.417(7) |
| C(40)-H(40)     | 0.9500   |
| C(41)-C(42)     | 1.369(6) |
| C(41)-H(41)     | 0.9500   |
| C(42)-H(42)     | 0.9500   |
| N(1)-Yb(1)      | 2.592(4) |
| N(2)-Yb(1)      | 2.597(4) |
|                 |          |
| N(1)-C(1)-C(2)  | 122.9(4) |
| N(1)-C(1)-C(12) | 116.5(4) |
| C(2)-C(1)-C(12) | 120.5(4) |
| C(1)-C(2)-C(3)  | 118.9(4) |
| C(1)-C(2)-H(2)  | 120.6    |
| C(3)-C(2)-H(2)  | 120.6    |

## Electronic Supporting Information

|                   |          |
|-------------------|----------|
| C(4)-C(3)-C(2)    | 118.5(4) |
| C(4)-C(3)-H(3)    | 120.8    |
| C(2)-C(3)-H(3)    | 120.8    |
| C(3)-C(4)-C(5)    | 120.1(4) |
| C(3)-C(4)-H(4)    | 120.0    |
| C(5)-C(4)-H(4)    | 120.0    |
| N(1)-C(5)-C(4)    | 121.9(4) |
| N(1)-C(5)-C(6)    | 117.5(4) |
| C(4)-C(5)-C(6)    | 120.5(4) |
| C(11)-C(6)-C(7)   | 118.1(4) |
| C(11)-C(6)-C(5)   | 121.6(4) |
| C(7)-C(6)-C(5)    | 120.1(4) |
| C(8)-C(7)-C(6)    | 121.1(5) |
| C(8)-C(7)-H(7)    | 119.5    |
| C(6)-C(7)-H(7)    | 119.5    |
| C(9)-C(8)-C(7)    | 119.9(5) |
| C(9)-C(8)-H(8)    | 120.0    |
| C(7)-C(8)-H(8)    | 120.0    |
| C(8)-C(9)-C(10)   | 120.2(5) |
| C(8)-C(9)-H(9)    | 119.9    |
| C(10)-C(9)-H(9)   | 119.9    |
| C(9)-C(10)-C(11)  | 120.0(5) |
| C(9)-C(10)-H(10)  | 120.0    |
| C(11)-C(10)-H(10) | 120.0    |
| C(6)-C(11)-C(10)  | 120.7(4) |
| C(6)-C(11)-H(11)  | 119.7    |
| C(10)-C(11)-H(11) | 119.7    |
| N(2)-C(12)-C(1)   | 124.5(5) |
| N(2)-C(12)-H(12)  | 117.7    |
| C(1)-C(12)-H(12)  | 117.7    |
| C(14)-C(13)-C(18) | 121.9(4) |
| C(14)-C(13)-N(2)  | 118.9(4) |
| C(18)-C(13)-N(2)  | 119.1(4) |
| C(13)-C(14)-C(15) | 118.3(4) |
| C(13)-C(14)-C(19) | 123.2(4) |
| C(15)-C(14)-C(19) | 118.4(4) |
| C(16)-C(15)-C(14) | 121.0(5) |
| C(16)-C(15)-H(15) | 119.5    |



## Electronic Supporting Information

|                     |          |
|---------------------|----------|
| C(14)-C(15)-H(15)   | 119.5    |
| C(15)-C(16)-C(17)   | 119.7(5) |
| C(15)-C(16)-H(16)   | 120.1    |
| C(17)-C(16)-H(16)   | 120.1    |
| C(18)-C(17)-C(16)   | 121.8(5) |
| C(18)-C(17)-H(17)   | 119.1    |
| C(16)-C(17)-H(17)   | 119.1    |
| C(17)-C(18)-C(13)   | 117.2(4) |
| C(17)-C(18)-C(22)   | 121.5(4) |
| C(13)-C(18)-C(22)   | 121.3(4) |
| C(21)-C(19)-C(14)   | 111.7(4) |
| C(21)-C(19)-C(20)   | 109.7(4) |
| C(14)-C(19)-C(20)   | 112.0(4) |
| C(21)-C(19)-H(19)   | 107.8    |
| C(14)-C(19)-H(19)   | 107.8    |
| C(20)-C(19)-H(19)   | 107.8    |
| C(19)-C(20)-H(20A)  | 109.5    |
| C(19)-C(20)-H(20B)  | 109.5    |
| H(20A)-C(20)-H(20B) | 109.5    |
| C(19)-C(20)-H(20C)  | 109.5    |
| H(20A)-C(20)-H(20C) | 109.5    |
| H(20B)-C(20)-H(20C) | 109.5    |
| C(19)-C(21)-H(21A)  | 109.5    |
| C(19)-C(21)-H(21B)  | 109.5    |
| H(21A)-C(21)-H(21B) | 109.5    |
| C(19)-C(21)-H(21C)  | 109.5    |
| H(21A)-C(21)-H(21C) | 109.5    |
| H(21B)-C(21)-H(21C) | 109.5    |
| C(18)-C(22)-C(24)   | 113.0(4) |
| C(18)-C(22)-C(23)   | 110.6(4) |
| C(24)-C(22)-C(23)   | 110.4(4) |
| C(18)-C(22)-H(22)   | 107.5    |
| C(24)-C(22)-H(22)   | 107.5    |
| C(23)-C(22)-H(22)   | 107.5    |
| C(22)-C(23)-H(23A)  | 109.5    |
| C(22)-C(23)-H(23B)  | 109.5    |
| H(23A)-C(23)-H(23B) | 109.5    |
| C(22)-C(23)-H(23C)  | 109.5    |

## Electronic Supporting Information

|                     |          |
|---------------------|----------|
| H(23A)-C(23)-H(23C) | 109.5    |
| H(23B)-C(23)-H(23C) | 109.5    |
| C(22)-C(24)-H(24A)  | 109.5    |
| C(22)-C(24)-H(24B)  | 109.5    |
| H(24A)-C(24)-H(24B) | 109.5    |
| C(22)-C(24)-H(24C)  | 109.5    |
| H(24A)-C(24)-H(24C) | 109.5    |
| H(24B)-C(24)-H(24C) | 109.5    |
| C(33)-C(25)-C(26)   | 132.7(5) |
| C(33)-C(25)-C(29)   | 119.6(4) |
| C(26)-C(25)-C(29)   | 107.6(4) |
| C(33)-C(25)-Yb(1)   | 122.4(3) |
| C(26)-C(25)-Yb(1)   | 73.2(3)  |
| C(29)-C(25)-Yb(1)   | 72.1(2)  |
| C(27)-C(26)-C(25)   | 106.5(4) |
| C(27)-C(26)-Yb(1)   | 72.2(3)  |
| C(25)-C(26)-Yb(1)   | 77.7(3)  |
| C(27)-C(26)-H(26)   | 126.7    |
| C(25)-C(26)-H(26)   | 126.7    |
| Yb(1)-C(26)-H(26)   | 115.8    |
| C(28)-C(27)-C(26)   | 110.0(4) |
| C(28)-C(27)-Yb(1)   | 74.1(3)  |
| C(26)-C(27)-Yb(1)   | 78.0(3)  |
| C(28)-C(27)-H(27)   | 125.0    |
| C(26)-C(27)-H(27)   | 125.0    |
| Yb(1)-C(27)-H(27)   | 114.8    |
| C(27)-C(28)-C(29)   | 107.9(5) |
| C(27)-C(28)-Yb(1)   | 76.1(3)  |
| C(29)-C(28)-Yb(1)   | 78.2(3)  |
| C(27)-C(28)-H(28)   | 126.0    |
| C(29)-C(28)-H(28)   | 126.0    |
| Yb(1)-C(28)-H(28)   | 112.2    |
| C(28)-C(29)-C(30)   | 133.3(5) |
| C(28)-C(29)-C(25)   | 107.9(4) |
| C(30)-C(29)-C(25)   | 118.8(4) |
| C(28)-C(29)-Yb(1)   | 72.1(2)  |
| C(30)-C(29)-Yb(1)   | 117.9(3) |
| C(25)-C(29)-Yb(1)   | 78.2(2)  |

## Electronic Supporting Information

|                   |          |
|-------------------|----------|
| C(31)-C(30)-C(29) | 119.4(5) |
| C(31)-C(30)-H(30) | 120.3    |
| C(29)-C(30)-H(30) | 120.3    |
| C(30)-C(31)-C(32) | 121.5(5) |
| C(30)-C(31)-H(31) | 119.2    |
| C(32)-C(31)-H(31) | 119.2    |
| C(33)-C(32)-C(31) | 121.2(5) |
| C(33)-C(32)-H(32) | 119.4    |
| C(31)-C(32)-H(32) | 119.4    |
| C(32)-C(33)-C(25) | 119.4(5) |
| C(32)-C(33)-H(33) | 120.3    |
| C(25)-C(33)-H(33) | 120.3    |
| C(42)-C(34)-C(35) | 132.9(5) |
| C(42)-C(34)-C(38) | 119.2(4) |
| C(35)-C(34)-C(38) | 107.8(4) |
| C(42)-C(34)-Yb(1) | 121.5(3) |
| C(35)-C(34)-Yb(1) | 71.1(3)  |
| C(38)-C(34)-Yb(1) | 76.3(3)  |
| C(36)-C(35)-C(34) | 107.2(4) |
| C(36)-C(35)-Yb(1) | 74.8(3)  |
| C(34)-C(35)-Yb(1) | 78.7(3)  |
| C(36)-C(35)-H(35) | 126.4    |
| C(34)-C(35)-H(35) | 126.4    |
| Yb(1)-C(35)-H(35) | 112.6    |
| C(35)-C(36)-C(37) | 110.7(4) |
| C(35)-C(36)-Yb(1) | 75.2(3)  |
| C(37)-C(36)-Yb(1) | 77.2(3)  |
| C(35)-C(36)-H(36) | 124.6    |
| C(37)-C(36)-H(36) | 124.6    |
| Yb(1)-C(36)-H(36) | 114.8    |
| C(36)-C(37)-C(38) | 107.0(4) |
| C(36)-C(37)-Yb(1) | 73.1(3)  |
| C(38)-C(37)-Yb(1) | 78.0(3)  |
| C(36)-C(37)-H(37) | 126.5    |
| C(38)-C(37)-H(37) | 126.5    |
| Yb(1)-C(37)-H(37) | 114.8    |
| C(39)-C(38)-C(34) | 119.8(4) |
| C(39)-C(38)-C(37) | 132.8(5) |

## Electronic Supporting Information

|                   |            |
|-------------------|------------|
| C(34)-C(38)-C(37) | 107.3(4)   |
| C(39)-C(38)-Yb(1) | 122.4(3)   |
| C(34)-C(38)-Yb(1) | 74.2(3)    |
| C(37)-C(38)-Yb(1) | 72.0(3)    |
| C(40)-C(39)-C(38) | 119.6(5)   |
| C(40)-C(39)-H(39) | 120.2      |
| C(38)-C(39)-H(39) | 120.2      |
| C(39)-C(40)-C(41) | 120.6(4)   |
| C(39)-C(40)-H(40) | 119.7      |
| C(41)-C(40)-H(40) | 119.7      |
| C(42)-C(41)-C(40) | 121.3(5)   |
| C(42)-C(41)-H(41) | 119.3      |
| C(40)-C(41)-H(41) | 119.3      |
| C(41)-C(42)-C(34) | 119.4(5)   |
| C(41)-C(42)-H(42) | 120.3      |
| C(34)-C(42)-H(42) | 120.3      |
| C(5)-N(1)-C(1)    | 117.7(4)   |
| C(5)-N(1)-Yb(1)   | 125.6(3)   |
| C(1)-N(1)-Yb(1)   | 112.7(3)   |
| C(12)-N(2)-C(13)  | 116.1(4)   |
| C(12)-N(2)-Yb(1)  | 113.0(3)   |
| C(13)-N(2)-Yb(1)  | 130.9(3)   |
| N(1)-Yb(1)-N(2)   | 65.27(12)  |
| N(1)-Yb(1)-C(28)  | 138.02(13) |
| N(2)-Yb(1)-C(28)  | 132.16(14) |
| N(1)-Yb(1)-C(36)  | 124.25(13) |
| N(2)-Yb(1)-C(36)  | 134.33(13) |
| C(28)-Yb(1)-C(36) | 74.32(15)  |
| N(1)-Yb(1)-C(35)  | 119.08(13) |
| N(2)-Yb(1)-C(35)  | 104.36(13) |
| C(28)-Yb(1)-C(35) | 95.12(15)  |
| C(36)-Yb(1)-C(35) | 29.99(14)  |
| N(1)-Yb(1)-C(27)  | 111.48(13) |
| N(2)-Yb(1)-C(27)  | 115.70(14) |
| C(28)-Yb(1)-C(27) | 29.83(14)  |
| C(36)-Yb(1)-C(27) | 101.96(15) |
| C(35)-Yb(1)-C(27) | 124.94(15) |
| N(1)-Yb(1)-C(37)  | 96.93(12)  |

## Electronic Supporting Information

|                   |            |
|-------------------|------------|
| N(2)-Yb(1)-C(37)  | 138.48(13) |
| C(28)-Yb(1)-C(37) | 86.78(14)  |
| C(36)-Yb(1)-C(37) | 29.71(13)  |
| C(35)-Yb(1)-C(37) | 49.88(14)  |
| C(27)-Yb(1)-C(37) | 105.65(15) |
| N(1)-Yb(1)-C(29)  | 156.62(12) |
| N(2)-Yb(1)-C(29)  | 109.08(13) |
| C(28)-Yb(1)-C(29) | 29.72(13)  |
| C(36)-Yb(1)-C(29) | 76.72(14)  |
| C(35)-Yb(1)-C(29) | 84.20(14)  |
| C(27)-Yb(1)-C(29) | 48.64(14)  |
| C(37)-Yb(1)-C(29) | 100.58(14) |
| N(1)-Yb(1)-C(26)  | 107.58(12) |
| N(2)-Yb(1)-C(26)  | 86.91(13)  |
| C(28)-Yb(1)-C(26) | 49.61(15)  |
| C(36)-Yb(1)-C(26) | 122.53(14) |
| C(35)-Yb(1)-C(26) | 132.58(14) |
| C(27)-Yb(1)-C(26) | 29.80(14)  |
| C(37)-Yb(1)-C(26) | 134.57(14) |
| C(29)-Yb(1)-C(26) | 49.08(14)  |
| N(1)-Yb(1)-C(34)  | 88.99(12)  |
| N(2)-Yb(1)-C(34)  | 91.35(13)  |
| C(28)-Yb(1)-C(34) | 122.54(14) |
| C(36)-Yb(1)-C(34) | 48.90(14)  |
| C(35)-Yb(1)-C(34) | 30.11(13)  |
| C(27)-Yb(1)-C(34) | 150.82(15) |
| C(37)-Yb(1)-C(34) | 49.33(14)  |
| C(29)-Yb(1)-C(34) | 114.20(14) |
| C(26)-Yb(1)-C(34) | 160.71(14) |
| N(1)-Yb(1)-C(38)  | 76.28(12)  |
| N(2)-Yb(1)-C(38)  | 109.07(13) |
| C(28)-Yb(1)-C(38) | 116.65(14) |
| C(36)-Yb(1)-C(38) | 48.76(14)  |
| C(35)-Yb(1)-C(38) | 49.44(14)  |
| C(27)-Yb(1)-C(38) | 133.54(15) |
| C(37)-Yb(1)-C(38) | 29.98(13)  |
| C(29)-Yb(1)-C(38) | 125.48(14) |
| C(26)-Yb(1)-C(38) | 163.33(14) |

## Electronic Supporting Information

|                   |            |
|-------------------|------------|
| C(34)-Yb(1)-C(38) | 29.50(13)  |
| N(1)-Yb(1)-C(25)  | 130.15(12) |
| N(2)-Yb(1)-C(25)  | 83.58(13)  |
| C(28)-Yb(1)-C(25) | 48.95(15)  |
| C(36)-Yb(1)-C(25) | 105.47(14) |
| C(35)-Yb(1)-C(25) | 105.34(14) |
| C(27)-Yb(1)-C(25) | 48.17(15)  |
| C(37)-Yb(1)-C(25) | 130.26(14) |
| C(29)-Yb(1)-C(25) | 29.72(13)  |
| C(26)-Yb(1)-C(25) | 29.13(13)  |
| C(34)-Yb(1)-C(25) | 131.59(14) |
| C(38)-Yb(1)-C(25) | 153.28(14) |

---

**Table S11.** Anisotropic displacement parameters ( $\text{\AA}^2 \times 10^3$ ) for **6**. The anisotropic displacement factor exponent takes the form:  $-2\pi^2 [ h^2 a^{*2} U^{11} + \dots + 2 h k a^* b^* U^{12} ]$

|       | U <sup>11</sup> | U <sup>22</sup> | U <sup>33</sup> | U <sup>23</sup> | U <sup>13</sup> | U <sup>12</sup> |
|-------|-----------------|-----------------|-----------------|-----------------|-----------------|-----------------|
| C(1)  | 20(3)           | 10(3)           | 19(3)           | 2(2)            | 13(2)           | 2(2)            |
| C(2)  | 23(3)           | 20(3)           | 9(3)            | -3(2)           | 7(2)            | 0(2)            |
| C(3)  | 20(3)           | 26(3)           | 12(3)           | 3(2)            | 3(2)            | 0(2)            |
| C(4)  | 18(3)           | 19(3)           | 20(3)           | 7(2)            | 8(2)            | 3(2)            |
| C(5)  | 16(3)           | 14(3)           | 15(3)           | 6(2)            | 8(2)            | -2(2)           |
| C(6)  | 18(3)           | 14(3)           | 16(3)           | -3(2)           | 7(2)            | -2(2)           |
| C(7)  | 17(3)           | 16(3)           | 23(3)           | 1(2)            | 9(2)            | 1(2)            |
| C(8)  | 22(3)           | 24(3)           | 17(3)           | -1(2)           | 7(2)            | -1(2)           |
| C(9)  | 17(3)           | 26(3)           | 23(3)           | -9(2)           | 8(2)            | -1(2)           |
| C(10) | 24(3)           | 21(3)           | 26(3)           | 0(2)            | 10(2)           | 6(2)            |
| C(11) | 20(3)           | 21(3)           | 21(3)           | 3(2)            | 6(2)            | 6(2)            |
| C(12) | 27(3)           | 11(3)           | 20(3)           | -2(2)           | 16(3)           | 0(2)            |
| C(13) | 17(3)           | 15(3)           | 14(3)           | 0(2)            | 4(2)            | 2(2)            |
| C(14) | 22(3)           | 24(3)           | 13(3)           | 6(2)            | 8(2)            | 10(2)           |
| C(15) | 27(3)           | 16(3)           | 23(3)           | 4(2)            | 10(2)           | -5(2)           |
| C(16) | 22(3)           | 19(3)           | 27(3)           | 5(2)            | 8(2)            | 3(2)            |
| C(17) | 25(3)           | 20(3)           | 26(3)           | -1(2)           | 12(2)           | 3(2)            |
| C(18) | 22(3)           | 15(3)           | 17(3)           | 1(2)            | 6(2)            | 3(2)            |

## Electronic Supporting Information

|       |       |       |       |       |       |       |
|-------|-------|-------|-------|-------|-------|-------|
| C(19) | 25(3) | 14(3) | 35(3) | 7(2)  | 17(2) | 2(2)  |
| C(20) | 38(3) | 25(4) | 45(4) | 5(3)  | 30(3) | -3(3) |
| C(21) | 24(3) | 45(4) | 54(4) | 0(3)  | 17(3) | 0(3)  |
| C(22) | 31(3) | 12(3) | 25(3) | 3(2)  | 17(2) | 5(2)  |
| C(23) | 47(4) | 18(3) | 33(3) | 4(2)  | 24(3) | 9(3)  |
| C(24) | 39(4) | 27(4) | 42(4) | 3(3)  | 26(3) | 2(3)  |
| C(25) | 20(3) | 16(3) | 14(3) | 3(2)  | 1(2)  | -3(2) |
| C(26) | 20(3) | 25(3) | 16(3) | 3(2)  | 5(2)  | -3(2) |
| C(27) | 19(3) | 39(4) | 12(3) | 2(2)  | 2(2)  | 7(2)  |
| C(28) | 25(3) | 20(3) | 12(3) | -2(2) | 4(2)  | -1(2) |
| C(29) | 13(3) | 27(3) | 10(2) | 1(2)  | -1(2) | -1(2) |
| C(30) | 23(3) | 24(3) | 16(3) | 3(2)  | 4(2)  | -3(2) |
| C(31) | 19(3) | 39(4) | 22(3) | 0(3)  | 10(2) | 0(3)  |
| C(32) | 32(3) | 26(3) | 16(3) | -2(2) | 7(2)  | 12(3) |
| C(33) | 27(3) | 18(3) | 22(3) | 2(2)  | 6(2)  | 1(2)  |
| C(34) | 23(3) | 20(3) | 17(3) | 3(2)  | 12(2) | 0(2)  |
| C(35) | 21(3) | 17(3) | 23(3) | 8(2)  | 9(2)  | 0(2)  |
| C(36) | 21(3) | 23(3) | 24(3) | 5(2)  | 8(2)  | -7(2) |
| C(37) | 32(3) | 16(3) | 18(3) | -4(2) | 13(2) | -4(2) |
| C(38) | 26(3) | 12(3) | 22(3) | 8(2)  | 12(2) | 1(2)  |
| C(39) | 22(3) | 22(3) | 28(3) | 11(2) | 14(2) | 6(2)  |
| C(40) | 21(3) | 29(3) | 18(3) | 9(2)  | 3(2)  | -3(2) |
| C(41) | 33(3) | 23(3) | 14(3) | 0(2)  | 9(2)  | -7(2) |
| C(42) | 33(3) | 14(3) | 18(3) | 2(2)  | 14(2) | -1(2) |
| N(1)  | 11(2) | 10(2) | 15(2) | 1(2)  | 7(2)  | -2(2) |
| N(2)  | 20(2) | 12(2) | 18(2) | 2(2)  | 12(2) | 1(2)  |
| Yb(1) | 18(1) | 17(1) | 14(1) | 0(1)  | 6(1)  | -1(1) |

---

### Crystallographic data and tables for **7** (CCDC: 794889)

**Table S12.** Atomic coordinates ( $\times 10^4$ ) and equivalent isotropic displacement parameters ( $\text{\AA}^2 \times 10^3$ ) for **7**.  $U(\text{eq})$  is defined as one third of the trace of the orthogonalized  $U^{ij}$  tensor.

---

---

## Electronic Supporting Information

|       |         |          |         |       |
|-------|---------|----------|---------|-------|
| C(1)  | 4310(2) | 9556(5)  | 6694(3) | 18(1) |
| C(2)  | 4422(2) | 8253(5)  | 6629(3) | 20(1) |
| C(3)  | 4104(2) | 7504(5)  | 6095(3) | 24(1) |
| C(4)  | 3677(2) | 8095(6)  | 5632(3) | 23(1) |
| C(5)  | 3576(2) | 9412(5)  | 5726(3) | 19(1) |
| C(6)  | 3112(2) | 10057(6) | 5264(3) | 23(1) |
| C(7)  | 3101(2) | 11379(6) | 5096(3) | 24(1) |
| C(8)  | 2581(2) | 11774(5) | 4644(3) | 16(1) |
| C(9)  | 2643(3) | 9440(6)  | 4969(4) | 40(2) |
| C(10) | 4686(2) | 10349(5) | 7214(3) | 18(1) |
| C(11) | 5074(2) | 12184(5) | 7758(3) | 20(1) |
| C(12) | 5572(3) | 12283(6) | 7274(5) | 21(2) |
| C(13) | 6044(2) | 12822(6) | 7663(4) | 31(1) |
| C(14) | 6028(2) | 13278(6) | 8478(4) | 31(1) |
| C(15) | 5527(2) | 13284(5) | 8918(3) | 25(1) |
| C(16) | 5042(2) | 12733(5) | 8573(3) | 21(1) |
| C(17) | 5618(3) | 11889(7) | 6339(4) | 29(2) |
| C(18) | 5796(3) | 13079(7) | 5806(4) | 36(2) |
| C(19) | 6022(3) | 10815(7) | 6170(4) | 45(2) |
| C(20) | 4496(2) | 12729(5) | 9089(3) | 29(1) |
| C(21) | 4547(3) | 11871(8) | 9859(4) | 44(2) |
| C(22) | 4336(3) | 14102(6) | 9374(4) | 46(2) |
| C(23) | 3660(2) | 14428(5) | 5729(3) | 20(1) |
| C(24) | 4215(2) | 14097(4) | 5999(3) | 21(1) |
| C(25) | 4251(2) | 14416(4) | 6884(5) | 25(1) |
| C(26) | 3733(2) | 14862(5) | 7165(3) | 24(1) |
| C(27) | 3351(2) | 14891(5) | 6461(3) | 21(1) |
| C(28) | 2788(2) | 15345(5) | 6353(4) | 29(1) |
| C(29) | 2563(2) | 15378(6) | 5562(4) | 36(2) |
| C(30) | 2872(3) | 14939(6) | 4852(4) | 37(2) |
| C(31) | 3402(2) | 14470(5) | 4919(3) | 29(1) |
| C(32) | 3145(2) | 10914(6) | 8273(3) | 24(1) |
| C(33) | 3031(2) | 12236(6) | 8368(4) | 29(1) |
| C(34) | 2638(2) | 12592(6) | 7745(4) | 34(1) |
| C(35) | 2514(2) | 11529(6) | 7231(4) | 31(1) |
| C(36) | 2819(2) | 10469(6) | 7557(3) | 25(1) |
| C(37) | 2839(2) | 9127(6)  | 7348(3) | 32(1) |
| C(38) | 3161(3) | 8320(6)  | 7815(4) | 35(1) |



## Electronic Supporting Information

|       |         |           |           |         |
|-------|---------|-----------|-----------|---------|
| C(39) | 3490(2) | 8773(6)   | 8496(4)   | 33(1)   |
| C(40) | 3478(3) | 10027(6)  | 8721(3)   | 29(1)   |
| C(41) | 4314(4) | 10741(9)  | 13868(5)  | 69(2)   |
| C(42) | 4745(4) | 11497(11) | 14057(6)  | 84(3)   |
| C(43) | 4808(5) | 12694(9)  | 13702(6)  | 84(3)   |
| C(44) | 4470(4) | 13124(8)  | 13167(5)  | 65(2)   |
| C(45) | 4014(5) | 12442(9)  | 12908(7)  | 85(3)   |
| C(46) | 3917(4) | 11139(10) | 13269(6)  | 90(3)   |
| C(47) | 3735(8) | 13130(20) | 12116(18) | 276(11) |
| N(1)  | 3893(2) | 10136(4)  | 6258(3)   | 16(1)   |
| N(2)  | 4590(2) | 11539(4)  | 7398(2)   | 16(1)   |
| S(1)  | 2198(1) | 10447(2)  | 4476(2)   | 64(1)   |
| Yb(1) | 3603(1) | 12289(1)  | 6887(1)   | 17(1)   |

---

**Table S13.** Bond lengths [ $\text{\AA}$ ] and angles [ $^\circ$ ] for **7**.

|            |          |
|------------|----------|
| C(1)-N(1)  | 1.344(6) |
| C(1)-C(2)  | 1.382(7) |
| C(1)-C(10) | 1.462(6) |
| C(2)-C(3)  | 1.369(7) |
| C(2)-H(2)  | 0.9500   |
| C(3)-C(4)  | 1.387(8) |
| C(3)-H(3)  | 0.9500   |
| C(4)-C(5)  | 1.395(8) |
| C(4)-H(4)  | 0.9500   |
| C(5)-N(1)  | 1.351(6) |
| C(5)-C(6)  | 1.478(7) |
| C(6)-C(9)  | 1.363(7) |
| C(6)-C(7)  | 1.397(8) |
| C(7)-C(8)  | 1.479(7) |
| C(7)-Yb(1) | 3.194(5) |
| C(7)-H(7)  | 0.9500   |
| C(8)-S(1)  | 1.671(5) |
| C(8)-H(8)  | 0.9500   |
| C(9)-S(1)  | 1.675(6) |
| C(9)-H(9)  | 0.9500   |

## Electronic Supporting Information

|              |           |
|--------------|-----------|
| C(10)-N(2)   | 1.289(6)  |
| C(10)-H(10)  | 0.9500    |
| C(11)-C(16)  | 1.402(7)  |
| C(11)-C(12)  | 1.407(9)  |
| C(11)-N(2)   | 1.444(6)  |
| C(12)-C(13)  | 1.390(9)  |
| C(12)-C(17)  | 1.526(7)  |
| C(13)-C(14)  | 1.364(8)  |
| C(13)-H(13)  | 0.9500    |
| C(14)-C(15)  | 1.371(7)  |
| C(14)-H(14)  | 0.9500    |
| C(15)-C(16)  | 1.394(7)  |
| C(15)-H(15)  | 0.9500    |
| C(16)-C(20)  | 1.526(8)  |
| C(17)-C(19)  | 1.492(9)  |
| C(17)-C(18)  | 1.550(10) |
| C(17)-H(17)  | 1.0000    |
| C(18)-H(18A) | 0.9800    |
| C(18)-H(18B) | 0.9800    |
| C(18)-H(18C) | 0.9800    |
| C(19)-H(19A) | 0.9800    |
| C(19)-H(19B) | 0.9800    |
| C(19)-H(19C) | 0.9800    |
| C(20)-C(21)  | 1.506(8)  |
| C(20)-C(22)  | 1.540(8)  |
| C(20)-H(20)  | 1.0000    |
| C(21)-H(21A) | 0.9800    |
| C(21)-H(21B) | 0.9800    |
| C(21)-H(21C) | 0.9800    |
| C(22)-H(22A) | 0.9800    |
| C(22)-H(22B) | 0.9800    |
| C(22)-H(22C) | 0.9800    |
| C(23)-C(31)  | 1.410(7)  |
| C(23)-C(24)  | 1.423(7)  |
| C(23)-C(27)  | 1.444(7)  |
| C(23)-Yb(1)  | 2.872(5)  |
| C(24)-C(25)  | 1.430(9)  |
| C(24)-Yb(1)  | 2.751(5)  |

## Electronic Supporting Information

|             |          |
|-------------|----------|
| C(24)-H(24) | 0.9500   |
| C(25)-C(26) | 1.383(7) |
| C(25)-Yb(1) | 2.688(4) |
| C(25)-H(25) | 0.9500   |
| C(26)-C(27) | 1.429(7) |
| C(26)-Yb(1) | 2.723(5) |
| C(26)-H(26) | 0.9500   |
| C(27)-C(28) | 1.424(7) |
| C(27)-Yb(1) | 2.845(5) |
| C(28)-C(29) | 1.350(8) |
| C(28)-H(28) | 0.9500   |
| C(29)-C(30) | 1.407(9) |
| C(29)-H(29) | 0.9500   |
| C(30)-C(31) | 1.353(8) |
| C(30)-H(30) | 0.9500   |
| C(31)-H(31) | 0.9500   |
| C(32)-C(40) | 1.402(8) |
| C(32)-C(33) | 1.407(8) |
| C(32)-C(36) | 1.438(7) |
| C(32)-Yb(1) | 2.818(6) |
| C(33)-C(34) | 1.400(8) |
| C(33)-Yb(1) | 2.690(5) |
| C(33)-H(33) | 0.9500   |
| C(34)-C(35) | 1.399(8) |
| C(34)-Yb(1) | 2.673(5) |
| C(34)-H(34) | 0.9500   |
| C(35)-C(36) | 1.412(8) |
| C(35)-Yb(1) | 2.751(5) |
| C(35)-H(35) | 0.9500   |
| C(36)-C(37) | 1.432(8) |
| C(36)-Yb(1) | 2.850(5) |
| C(37)-C(38) | 1.349(8) |
| C(37)-H(37) | 0.9500   |
| C(38)-C(39) | 1.405(8) |
| C(38)-H(38) | 0.9500   |
| C(39)-C(40) | 1.349(9) |
| C(39)-H(39) | 0.9500   |
| C(40)-H(40) | 0.9500   |

## Electronic Supporting Information

|              |           |
|--------------|-----------|
| C(41)-C(42)  | 1.322(12) |
| C(41)-C(46)  | 1.393(12) |
| C(41)-H(41)  | 0.9500    |
| C(42)-C(43)  | 1.370(14) |
| C(42)-H(42)  | 0.9500    |
| C(43)-C(44)  | 1.243(12) |
| C(43)-H(43)  | 0.9500    |
| C(44)-C(45)  | 1.354(12) |
| C(44)-H(44)  | 0.9500    |
| C(45)-C(46)  | 1.484(13) |
| C(45)-C(47)  | 1.58(3)   |
| C(46)-H(46)  | 0.9500    |
| C(47)-H(47A) | 0.9800    |
| C(47)-H(47B) | 0.9800    |
| C(47)-H(47C) | 0.9800    |
| N(1)-Yb(1)   | 2.538(4)  |
| N(2)-Yb(1)   | 2.591(4)  |

|                 |          |
|-----------------|----------|
| N(1)-C(1)-C(2)  | 122.8(4) |
| N(1)-C(1)-C(10) | 118.6(4) |
| C(2)-C(1)-C(10) | 118.4(4) |
| C(3)-C(2)-C(1)  | 119.6(5) |
| C(3)-C(2)-H(2)  | 120.2    |
| C(1)-C(2)-H(2)  | 120.2    |
| C(2)-C(3)-C(4)  | 118.1(5) |
| C(2)-C(3)-H(3)  | 121.0    |
| C(4)-C(3)-H(3)  | 121.0    |
| C(3)-C(4)-C(5)  | 120.2(5) |
| C(3)-C(4)-H(4)  | 119.9    |
| C(5)-C(4)-H(4)  | 119.9    |
| N(1)-C(5)-C(4)  | 121.0(5) |
| N(1)-C(5)-C(6)  | 117.7(4) |
| C(4)-C(5)-C(6)  | 121.3(5) |
| C(9)-C(6)-C(7)  | 112.4(5) |
| C(9)-C(6)-C(5)  | 124.1(5) |
| C(7)-C(6)-C(5)  | 123.5(5) |
| C(6)-C(7)-C(8)  | 112.2(5) |
| C(6)-C(7)-Yb(1) | 96.8(4)  |

## Electronic Supporting Information

|                    |          |
|--------------------|----------|
| C(8)-C(7)-Yb(1)    | 130.5(3) |
| C(6)-C(7)-H(7)     | 123.9    |
| C(8)-C(7)-H(7)     | 123.9    |
| Yb(1)-C(7)-H(7)    | 46.5     |
| C(7)-C(8)-S(1)     | 107.5(4) |
| C(7)-C(8)-H(8)     | 126.3    |
| S(1)-C(8)-H(8)     | 126.3    |
| C(6)-C(9)-S(1)     | 112.2(5) |
| C(6)-C(9)-H(9)     | 123.9    |
| S(1)-C(9)-H(9)     | 123.9    |
| N(2)-C(10)-C(1)    | 123.8(4) |
| N(2)-C(10)-H(10)   | 118.1    |
| C(1)-C(10)-H(10)   | 118.1    |
| C(16)-C(11)-C(12)  | 120.5(5) |
| C(16)-C(11)-N(2)   | 120.1(4) |
| C(12)-C(11)-N(2)   | 119.3(5) |
| C(13)-C(12)-C(11)  | 117.8(6) |
| C(13)-C(12)-C(17)  | 118.2(8) |
| C(11)-C(12)-C(17)  | 123.9(7) |
| C(14)-C(13)-C(12)  | 121.9(6) |
| C(14)-C(13)-H(13)  | 119.0    |
| C(12)-C(13)-H(13)  | 119.0    |
| C(13)-C(14)-C(15)  | 119.8(5) |
| C(13)-C(14)-H(14)  | 120.1    |
| C(15)-C(14)-H(14)  | 120.1    |
| C(14)-C(15)-C(16)  | 121.1(5) |
| C(14)-C(15)-H(15)  | 119.4    |
| C(16)-C(15)-H(15)  | 119.4    |
| C(15)-C(16)-C(11)  | 118.4(5) |
| C(15)-C(16)-C(20)  | 119.7(5) |
| C(11)-C(16)-C(20)  | 122.0(5) |
| C(19)-C(17)-C(12)  | 114.6(6) |
| C(19)-C(17)-C(18)  | 108.9(6) |
| C(12)-C(17)-C(18)  | 108.9(6) |
| C(19)-C(17)-H(17)  | 108.1    |
| C(12)-C(17)-H(17)  | 108.1    |
| C(18)-C(17)-H(17)  | 108.1    |
| C(17)-C(18)-H(18A) | 109.5    |

## Electronic Supporting Information

|                     |          |
|---------------------|----------|
| C(17)-C(18)-H(18B)  | 109.5    |
| H(18A)-C(18)-H(18B) | 109.5    |
| C(17)-C(18)-H(18C)  | 109.5    |
| H(18A)-C(18)-H(18C) | 109.5    |
| H(18B)-C(18)-H(18C) | 109.5    |
| C(17)-C(19)-H(19A)  | 109.5    |
| C(17)-C(19)-H(19B)  | 109.5    |
| H(19A)-C(19)-H(19B) | 109.5    |
| C(17)-C(19)-H(19C)  | 109.5    |
| H(19A)-C(19)-H(19C) | 109.5    |
| H(19B)-C(19)-H(19C) | 109.5    |
| C(21)-C(20)-C(16)   | 111.0(5) |
| C(21)-C(20)-C(22)   | 109.5(5) |
| C(16)-C(20)-C(22)   | 111.1(5) |
| C(21)-C(20)-H(20)   | 108.4    |
| C(16)-C(20)-H(20)   | 108.4    |
| C(22)-C(20)-H(20)   | 108.4    |
| C(20)-C(21)-H(21A)  | 109.5    |
| C(20)-C(21)-H(21B)  | 109.5    |
| H(21A)-C(21)-H(21B) | 109.5    |
| C(20)-C(21)-H(21C)  | 109.5    |
| H(21A)-C(21)-H(21C) | 109.5    |
| H(21B)-C(21)-H(21C) | 109.5    |
| C(20)-C(22)-H(22A)  | 109.5    |
| C(20)-C(22)-H(22B)  | 109.5    |
| H(22A)-C(22)-H(22B) | 109.5    |
| C(20)-C(22)-H(22C)  | 109.5    |
| H(22A)-C(22)-H(22C) | 109.5    |
| H(22B)-C(22)-H(22C) | 109.5    |
| C(31)-C(23)-C(24)   | 132.5(5) |
| C(31)-C(23)-C(27)   | 119.0(5) |
| C(24)-C(23)-C(27)   | 108.2(4) |
| C(31)-C(23)-Yb(1)   | 125.0(3) |
| C(24)-C(23)-Yb(1)   | 70.7(3)  |
| C(27)-C(23)-Yb(1)   | 74.3(3)  |
| C(23)-C(24)-C(25)   | 106.7(4) |
| C(23)-C(24)-Yb(1)   | 80.1(3)  |
| C(25)-C(24)-Yb(1)   | 72.3(2)  |

## Electronic Supporting Information

|                   |          |
|-------------------|----------|
| C(23)-C(24)-H(24) | 126.7    |
| C(25)-C(24)-H(24) | 126.7    |
| Yb(1)-C(24)-H(24) | 113.4    |
| C(26)-C(25)-C(24) | 109.5(5) |
| C(26)-C(25)-Yb(1) | 76.6(3)  |
| C(24)-C(25)-Yb(1) | 77.2(3)  |
| C(26)-C(25)-H(25) | 125.2    |
| C(24)-C(25)-H(25) | 125.2    |
| Yb(1)-C(25)-H(25) | 113.1    |
| C(25)-C(26)-C(27) | 108.9(5) |
| C(25)-C(26)-Yb(1) | 73.8(3)  |
| C(27)-C(26)-Yb(1) | 80.0(3)  |
| C(25)-C(26)-H(26) | 125.6    |
| C(27)-C(26)-H(26) | 125.6    |
| Yb(1)-C(26)-H(26) | 113.0    |
| C(28)-C(27)-C(26) | 133.8(5) |
| C(28)-C(27)-C(23) | 119.4(5) |
| C(26)-C(27)-C(23) | 106.6(4) |
| C(28)-C(27)-Yb(1) | 122.6(4) |
| C(26)-C(27)-Yb(1) | 70.4(3)  |
| C(23)-C(27)-Yb(1) | 76.4(3)  |
| C(29)-C(28)-C(27) | 119.1(5) |
| C(29)-C(28)-H(28) | 120.5    |
| C(27)-C(28)-H(28) | 120.5    |
| C(28)-C(29)-C(30) | 121.0(5) |
| C(28)-C(29)-H(29) | 119.5    |
| C(30)-C(29)-H(29) | 119.5    |
| C(31)-C(30)-C(29) | 122.5(5) |
| C(31)-C(30)-H(30) | 118.8    |
| C(29)-C(30)-H(30) | 118.8    |
| C(30)-C(31)-C(23) | 118.9(6) |
| C(30)-C(31)-H(31) | 120.5    |
| C(23)-C(31)-H(31) | 120.5    |
| C(40)-C(32)-C(33) | 134.0(6) |
| C(40)-C(32)-C(36) | 118.9(6) |
| C(33)-C(32)-C(36) | 107.1(5) |
| C(40)-C(32)-Yb(1) | 120.2(3) |
| C(33)-C(32)-Yb(1) | 70.2(3)  |

## Electronic Supporting Information

|                   |           |
|-------------------|-----------|
| C(36)-C(32)-Yb(1) | 76.5(3)   |
| C(34)-C(33)-C(32) | 108.1(5)  |
| C(34)-C(33)-Yb(1) | 74.2(3)   |
| C(32)-C(33)-Yb(1) | 80.3(3)   |
| C(34)-C(33)-H(33) | 125.9     |
| C(32)-C(33)-H(33) | 125.9     |
| Yb(1)-C(33)-H(33) | 112.1     |
| C(35)-C(34)-C(33) | 109.5(5)  |
| C(35)-C(34)-Yb(1) | 78.2(3)   |
| C(33)-C(34)-Yb(1) | 75.5(3)   |
| C(35)-C(34)-H(34) | 125.3     |
| C(33)-C(34)-H(34) | 125.3     |
| Yb(1)-C(34)-H(34) | 113.2     |
| C(34)-C(35)-C(36) | 107.4(5)  |
| C(34)-C(35)-Yb(1) | 72.0(3)   |
| C(36)-C(35)-Yb(1) | 79.3(3)   |
| C(34)-C(35)-H(35) | 126.3     |
| C(36)-C(35)-H(35) | 126.3     |
| Yb(1)-C(35)-H(35) | 114.7     |
| C(35)-C(36)-C(37) | 133.7(5)  |
| C(35)-C(36)-C(32) | 107.9(5)  |
| C(37)-C(36)-C(32) | 118.3(5)  |
| C(35)-C(36)-Yb(1) | 71.6(3)   |
| C(37)-C(36)-Yb(1) | 122.7(3)  |
| C(32)-C(36)-Yb(1) | 74.1(3)   |
| C(38)-C(37)-C(36) | 119.9(5)  |
| C(38)-C(37)-H(37) | 120.1     |
| C(36)-C(37)-H(37) | 120.1     |
| C(37)-C(38)-C(39) | 121.3(6)  |
| C(37)-C(38)-H(38) | 119.4     |
| C(39)-C(38)-H(38) | 119.4     |
| C(40)-C(39)-C(38) | 120.7(6)  |
| C(40)-C(39)-H(39) | 119.6     |
| C(38)-C(39)-H(39) | 119.6     |
| C(39)-C(40)-C(32) | 120.9(6)  |
| C(39)-C(40)-H(40) | 119.5     |
| C(32)-C(40)-H(40) | 119.5     |
| C(42)-C(41)-C(46) | 119.8(10) |



## Electronic Supporting Information

|                     |            |
|---------------------|------------|
| C(42)-C(41)-H(41)   | 120.1      |
| C(46)-C(41)-H(41)   | 120.1      |
| C(41)-C(42)-C(43)   | 122.2(11)  |
| C(41)-C(42)-H(42)   | 118.9      |
| C(43)-C(42)-H(42)   | 118.9      |
| C(44)-C(43)-C(42)   | 122.0(11)  |
| C(44)-C(43)-H(43)   | 119.0      |
| C(42)-C(43)-H(43)   | 119.0      |
| C(43)-C(44)-C(45)   | 121.9(10)  |
| C(43)-C(44)-H(44)   | 119.1      |
| C(45)-C(44)-H(44)   | 119.1      |
| C(44)-C(45)-C(46)   | 119.1(10)  |
| C(44)-C(45)-C(47)   | 109.5(11)  |
| C(46)-C(45)-C(47)   | 130.4(13)  |
| C(41)-C(46)-C(45)   | 115.0(10)  |
| C(41)-C(46)-H(46)   | 122.5      |
| C(45)-C(46)-H(46)   | 122.5      |
| C(45)-C(47)-H(47A)  | 109.5      |
| C(45)-C(47)-H(47B)  | 109.5      |
| H(47A)-C(47)-H(47B) | 109.5      |
| C(45)-C(47)-H(47C)  | 109.5      |
| H(47A)-C(47)-H(47C) | 109.5      |
| H(47B)-C(47)-H(47C) | 109.5      |
| C(1)-N(1)-C(5)      | 118.2(4)   |
| C(1)-N(1)-Yb(1)     | 113.3(3)   |
| C(5)-N(1)-Yb(1)     | 125.4(3)   |
| C(10)-N(2)-C(11)    | 113.0(4)   |
| C(10)-N(2)-Yb(1)    | 112.3(3)   |
| C(11)-N(2)-Yb(1)    | 134.3(3)   |
| C(8)-S(1)-C(9)      | 95.7(3)    |
| N(1)-Yb(1)-N(2)     | 67.12(13)  |
| N(1)-Yb(1)-C(34)    | 122.08(16) |
| N(2)-Yb(1)-C(34)    | 130.71(15) |
| N(1)-Yb(1)-C(25)    | 124.60(16) |
| N(2)-Yb(1)-C(25)    | 74.47(13)  |
| C(34)-Yb(1)-C(25)   | 113.13(19) |
| N(1)-Yb(1)-C(33)    | 117.01(16) |
| N(2)-Yb(1)-C(33)    | 100.49(16) |

## Electronic Supporting Information

|                   |            |
|-------------------|------------|
| C(34)-Yb(1)-C(33) | 30.26(18)  |
| C(25)-Yb(1)-C(33) | 107.8(2)   |
| N(1)-Yb(1)-C(26)  | 153.52(15) |
| N(2)-Yb(1)-C(26)  | 98.25(15)  |
| C(34)-Yb(1)-C(26) | 84.31(18)  |
| C(25)-Yb(1)-C(26) | 29.61(15)  |
| C(33)-Yb(1)-C(26) | 86.52(17)  |
| N(1)-Yb(1)-C(24)  | 105.12(14) |
| N(2)-Yb(1)-C(24)  | 83.44(14)  |
| C(34)-Yb(1)-C(24) | 128.76(17) |
| C(25)-Yb(1)-C(24) | 30.5(2)    |
| C(33)-Yb(1)-C(24) | 135.83(17) |
| C(26)-Yb(1)-C(24) | 49.64(15)  |
| N(1)-Yb(1)-C(35)  | 94.44(15)  |
| N(2)-Yb(1)-C(35)  | 134.39(15) |
| C(34)-Yb(1)-C(35) | 29.84(18)  |
| C(25)-Yb(1)-C(35) | 140.46(16) |
| C(33)-Yb(1)-C(35) | 49.64(17)  |
| C(26)-Yb(1)-C(35) | 110.85(17) |
| C(24)-Yb(1)-C(35) | 142.11(16) |
| N(1)-Yb(1)-C(32)  | 87.59(16)  |
| N(2)-Yb(1)-C(32)  | 87.56(14)  |
| C(34)-Yb(1)-C(32) | 48.81(17)  |
| C(25)-Yb(1)-C(32) | 129.6(2)   |
| C(33)-Yb(1)-C(32) | 29.48(17)  |
| C(26)-Yb(1)-C(32) | 114.67(17) |
| C(24)-Yb(1)-C(32) | 159.99(16) |
| C(35)-Yb(1)-C(32) | 48.87(16)  |
| N(1)-Yb(1)-C(27)  | 143.23(15) |
| N(2)-Yb(1)-C(27)  | 123.20(14) |
| C(34)-Yb(1)-C(27) | 80.03(17)  |
| C(25)-Yb(1)-C(27) | 48.73(14)  |
| C(33)-Yb(1)-C(27) | 96.70(17)  |
| C(26)-Yb(1)-C(27) | 29.63(14)  |
| C(24)-Yb(1)-C(27) | 49.03(15)  |
| C(35)-Yb(1)-C(27) | 96.95(16)  |
| C(32)-Yb(1)-C(27) | 125.54(17) |
| N(1)-Yb(1)-C(36)  | 74.68(14)  |

## Electronic Supporting Information

|                   |            |
|-------------------|------------|
| N(2)-Yb(1)-C(36)  | 105.97(14) |
| C(34)-Yb(1)-C(36) | 48.30(17)  |
| C(25)-Yb(1)-C(36) | 156.5(2)   |
| C(33)-Yb(1)-C(36) | 48.69(16)  |
| C(26)-Yb(1)-C(36) | 131.68(16) |
| C(24)-Yb(1)-C(36) | 169.26(15) |
| C(35)-Yb(1)-C(36) | 29.14(16)  |
| C(32)-Yb(1)-C(36) | 29.40(15)  |
| C(27)-Yb(1)-C(36) | 125.36(16) |
| N(1)-Yb(1)-C(23)  | 114.95(14) |
| N(2)-Yb(1)-C(23)  | 112.65(13) |
| C(34)-Yb(1)-C(23) | 105.54(16) |
| C(25)-Yb(1)-C(23) | 48.49(18)  |
| C(33)-Yb(1)-C(23) | 125.87(17) |
| C(26)-Yb(1)-C(23) | 48.52(15)  |
| C(24)-Yb(1)-C(23) | 29.22(14)  |
| C(35)-Yb(1)-C(23) | 112.94(15) |
| C(32)-Yb(1)-C(23) | 153.87(17) |
| C(27)-Yb(1)-C(23) | 29.26(14)  |
| C(36)-Yb(1)-C(23) | 140.92(15) |

**Table S14.** Anisotropic displacement parameters ( $\text{\AA}^2 \times 10^3$ ) for **7**. The anisotropic displacement factor exponent takes the form:  $-2\pi^2 [ h^2 a^{*2} U^{11} + \dots + 2 h k a^* b^* U^{12} ]$

|       | U <sup>11</sup> | U <sup>22</sup> | U <sup>33</sup> | U <sup>23</sup> | U <sup>13</sup> | U <sup>12</sup> |
|-------|-----------------|-----------------|-----------------|-----------------|-----------------|-----------------|
| C(1)  | 17(2)           | 20(2)           | 15(3)           | -1(2)           | 5(2)            | -1(2)           |
| C(2)  | 19(2)           | 17(2)           | 23(3)           | 1(2)            | 6(2)            | 2(2)            |
| C(3)  | 24(3)           | 19(3)           | 29(3)           | -2(2)           | 6(2)            | -1(2)           |
| C(4)  | 25(3)           | 22(3)           | 22(3)           | -3(2)           | 3(2)            | -8(2)           |
| C(5)  | 16(2)           | 15(3)           | 24(2)           | -7(2)           | 4(2)            | -4(2)           |
| C(6)  | 18(3)           | 22(3)           | 28(3)           | -4(2)           | -1(2)           | -4(2)           |
| C(7)  | 21(3)           | 24(3)           | 27(3)           | -3(3)           | -7(2)           | 4(2)            |
| C(8)  | 25(3)           | 8(2)            | 17(2)           | -1(2)           | -13(2)          | -3(2)           |
| C(9)  | 32(3)           | 32(4)           | 56(4)           | -3(3)           | -18(3)          | -8(3)           |
| C(10) | 15(2)           | 22(3)           | 17(2)           | 2(2)            | -1(2)           | 1(2)            |

## Electronic Supporting Information

|       |       |       |       |        |        |        |
|-------|-------|-------|-------|--------|--------|--------|
| C(11) | 21(3) | 17(3) | 20(2) | 5(2)   | -6(2)  | -1(2)  |
| C(12) | 15(3) | 22(3) | 25(3) | -1(3)  | -1(2)  | 0(2)   |
| C(13) | 14(3) | 45(4) | 33(3) | 0(3)   | 0(2)   | -7(3)  |
| C(14) | 22(3) | 35(3) | 35(3) | -4(3)  | -9(3)  | -6(3)  |
| C(15) | 26(3) | 28(3) | 22(2) | -7(2)  | -9(2)  | -2(2)  |
| C(16) | 19(2) | 20(3) | 25(3) | 1(2)   | -3(2)  | 5(2)   |
| C(17) | 24(4) | 41(4) | 22(3) | -6(3)  | 1(3)   | -7(3)  |
| C(18) | 21(3) | 54(4) | 32(3) | 2(3)   | -3(3)  | -6(3)  |
| C(19) | 47(4) | 52(4) | 36(3) | -18(3) | 13(3)  | -2(3)  |
| C(20) | 25(3) | 32(3) | 28(3) | -12(3) | -2(2)  | -2(3)  |
| C(21) | 37(4) | 63(5) | 31(3) | 15(3)  | -8(3)  | -7(4)  |
| C(22) | 34(4) | 56(4) | 49(4) | -24(3) | 4(3)   | 12(3)  |
| C(23) | 22(3) | 14(3) | 24(2) | 4(2)   | -4(2)  | -2(2)  |
| C(24) | 19(3) | 12(2) | 33(3) | 5(2)   | 5(2)   | 1(2)   |
| C(25) | 21(2) | 18(2) | 37(2) | 15(5)  | -16(4) | -5(2)  |
| C(26) | 36(3) | 15(3) | 21(3) | -3(2)  | -3(2)  | 0(2)   |
| C(27) | 18(3) | 16(3) | 30(3) | 3(2)   | -1(2)  | -1(2)  |
| C(28) | 22(3) | 22(3) | 41(3) | 10(3)  | 9(3)   | 4(2)   |
| C(29) | 19(3) | 34(4) | 57(4) | 16(3)  | -6(3)  | -2(3)  |
| C(30) | 34(3) | 32(3) | 44(4) | 22(3)  | -24(3) | -12(3) |
| C(31) | 34(3) | 23(3) | 29(3) | 9(2)   | -1(3)  | -7(2)  |
| C(32) | 13(3) | 35(4) | 23(3) | -2(3)  | 7(2)   | -3(3)  |
| C(33) | 26(3) | 30(3) | 30(3) | -9(3)  | 12(2)  | -3(3)  |
| C(34) | 21(3) | 40(4) | 41(3) | 8(3)   | 13(3)  | 11(3)  |
| C(35) | 16(3) | 42(4) | 37(3) | 2(3)   | -4(2)  | 2(3)   |
| C(36) | 17(3) | 32(3) | 27(3) | -4(2)  | 5(2)   | -8(2)  |
| C(37) | 33(3) | 32(4) | 31(3) | -7(3)  | 10(3)  | -12(3) |
| C(38) | 41(4) | 20(3) | 43(3) | 4(3)   | 23(3)  | -3(3)  |
| C(39) | 34(4) | 27(4) | 37(3) | 8(3)   | 8(3)   | 3(3)   |
| C(40) | 33(4) | 32(4) | 20(3) | 5(2)   | 11(2)  | -7(3)  |
| N(1)  | 17(2) | 19(2) | 13(2) | -1(2)  | 0(2)   | -4(2)  |
| N(2)  | 17(2) | 18(2) | 13(2) | 0(2)   | -1(2)  | -1(2)  |
| S(1)  | 48(1) | 48(1) | 97(2) | 2(1)   | -34(1) | -6(1)  |
| Yb(1) | 15(1) | 16(1) | 20(1) | -1(1)  | 1(1)   | 1(1)   |

---

# Electronic Supporting Information

## UV-VIS spectra

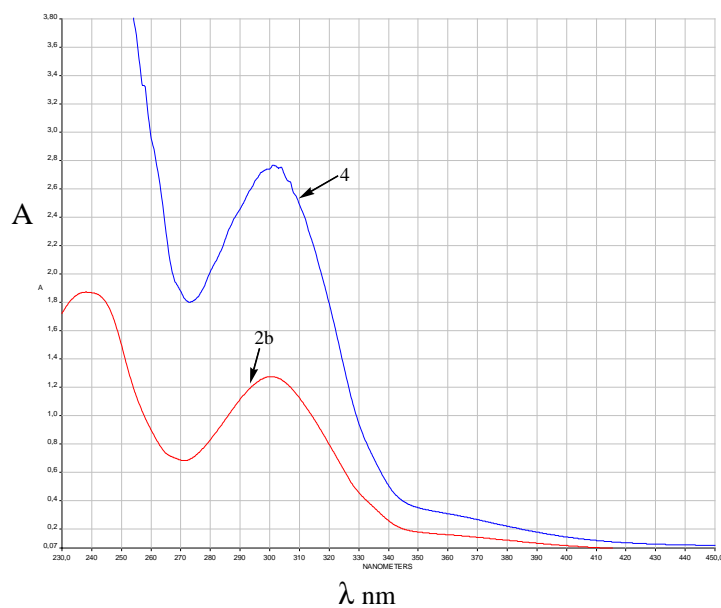

**Fig S1.** UV-VIS spectra of **2b** (red line) and **4** (blue line) in *n*-hexane.

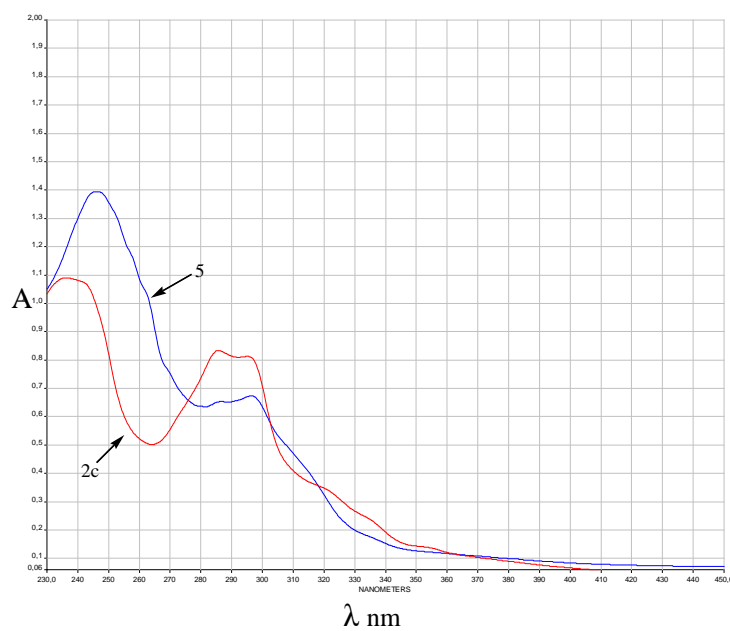

**Fig S2.** UV-VIS spectra of **2c** (red line) and **5** (blue line) in *n*-hexane.

## Electronic Supporting Information

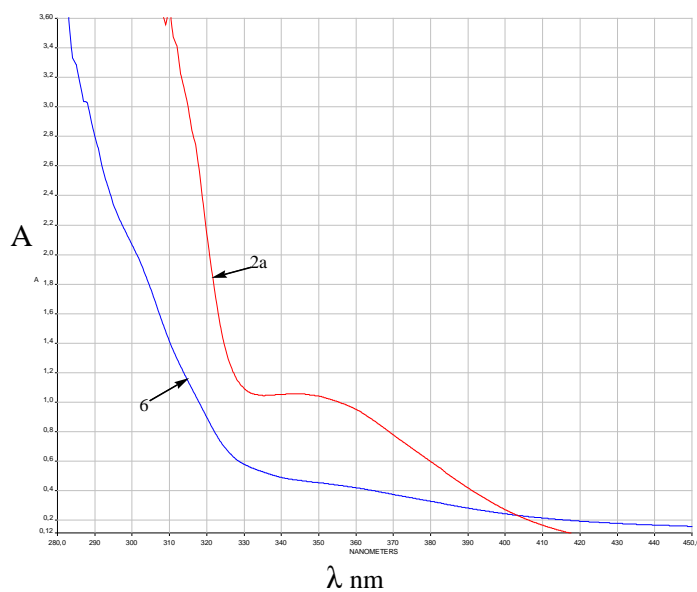

**Fig S3.** UV-VIS spectra of **2a** (red line) and **6** (blue line) in *n*-hexane.

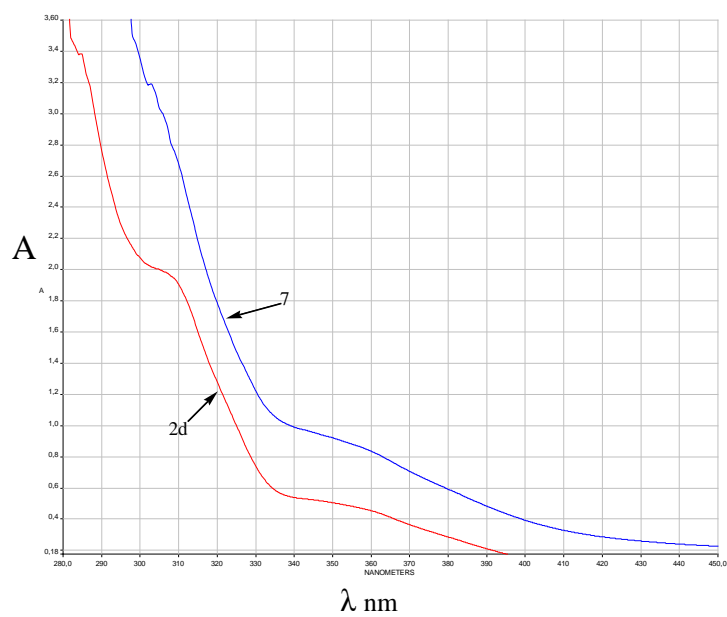

**Fig S4.** UV-VIS spectra of **2d** (red line) and **7** (blue line) in *n*-hexane.
